# Supplementary material for: Copper(i)/TF-BiphamPhos catalyzed asymmetric nitroso Diels–Alder reaction
Source: Royal Society of Chemistry journal article supplement (doi:10.1039/c6cc09587a), 2017-01-01
Supplement: c6cc09587a1.pdf [file c6cc09587a1.pdf]

*Electronic Supplementary Information*

## **Copper(I)/TF-Biphamphos Catalyzed Asymmetric Nitroso Diels-Alders Reaction**

Jun Li, Hai-Yan Tao, and Chun-Jiang Wang\*

*E-mail:* cjwang@whu.edu.cn

### **Table of Contents**

|      |                                                                                                      |        |
|------|------------------------------------------------------------------------------------------------------|--------|
| I.   | General Remarks.....                                                                                 | S2     |
| II.  | General Procedure for Cu(I)/TF-Biphamphos Catalyzed Asymmetric Nitroso<br>Diels-Alders Reaction..... | S2     |
| III. | References.....                                                                                      | S8     |
| IV.  | <sup>1</sup> H NMR and <sup>13</sup> C NMR Spectra.....                                              | S9-28  |
| V.   | HPLC Chromatograms.....                                                                              | S29-48 |

## I. General Remarks

<sup>1</sup>H NMR spectra were recorded on a Bruker 400 MHz spectrometer in CDCl<sub>3</sub>. Chemical shifts are reported in ppm with the internal TMS signal at 0.0 ppm as a standard. The data are reported as (s = single, d = double, t = triple, q = quarte, m = multiple or unresolved, brs = broad single, coupling constant(s) in Hz, integration). <sup>13</sup>C NMR spectra were recorded on a Bruker 100 MHz spectrometer in CDCl<sub>3</sub>. Chemical shifts are reported in ppm with the internal chloroform signal at 77.0 ppm as a standard. Enantiomeric ratios were determined by HPLC, using a chiralpak OD-H column with hexane and *i*-PrOH as solvents. **1a**, **1h**, **1i** were purchased from J&K Scientific and Aldrich. 1,3-Cyclopentadiene **1f** was cracked and distilled at 200°C. Various substituted 1,3-cyclohexadienes **1b-1e**, **1g**, **1j** and nitroso compounds **2a-2e** were prepared according to the literature procedure<sup>1,2</sup>.

## II. General Procedure for the Asymmetric Nitroso Diels-Alder Reaction of 1,3-dienes with nitroso compounds

Under argon atmosphere, TF-Biphamphos (17.6 mg, 0.022 mmol) and CuBF<sub>4</sub> (6.3 mg, 0.020 mmol) were dissolved in 4 mL DCM, and stirred at room temperature for about 30 min. The mixture was then cooled into -80°C and nitroso compound (0.20 mmol) dissolved in 0.5 mL of DCM was added. After stirred for 10 min, the 1,3-diene (0.24 mmol) dissolved in another 0.5 mL of DCM was added dropwise. The reaction mixture was gradually warmed to -40°C and kept at this temperature until the reaction complete. Then the organic solvent was removed and the residue was purified by column chromatography to give the product, which was then directly analyzed by HPLC to determine the enantiomeric excess. All the racemic samples were prepared by mixing the nitroso compounds (0.20 mmol) with the dienes (0.24 mmol) in DCM at 0°C

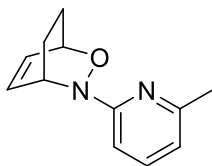

**3a** (known compound, see ref. 3)

**(1R,4S)-3-(6-methylpyridin-2-yl)-2-oxa-3-azabicyclo[2.2.2]oct-5-ene:** Yield (98%);  $[\alpha]_D^{25} = -149$  (*c* 0.90, CHCl<sub>3</sub>); <sup>1</sup>H NMR (CDCl<sub>3</sub>, TMS, 400 MHz)  $\delta$  7.39 (t, *J* = 8.0 Hz, 1H), 6.71 (d, *J* = 8.0 Hz, 1H), 6.63 (d, *J* = 8.0 Hz, 1H), 6.49-6.45 (m, 1H), 6.30-6.25 (m, 1H), 5.32-5.28 (m, 1H), 4.72-4.69 (m, 1H), 2.42 (s, 3H), 2.30-2.20 (m, 2H), 1.62-1.55 (m, 1H), 1.43-1.34 (m, 1H); <sup>13</sup>C NMR (CDCl<sub>3</sub>, TMS, 100 MHz)  $\delta$  163.7, 156.1, 137.5, 131.6, 130.7, 116.0, 108.0, 69.5, 52.4, 24.2, 24.1, 20.5. The product was analyzed by HPLC to determine the enantiomeric excess: 96% ee (chiralpak OD-H, *i*-propanol/hexane = 5/95, flow rate 1.0 mL/min,  $\lambda$  = 254 nm);  $t_r$  = 9.25 and 10.43 min.

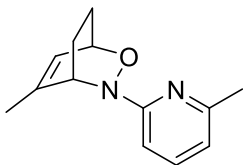

**3b** (known compound, see ref. 3)

**(1R,4S)-5-methyl-3-(6-methylpyridin-2-yl)-2-oxa-3-azabicyclo[2.2.2]oct-5-ene:** Yield (95%);  $[\alpha]_D^{25} = -110$  (*c* 0.68, CHCl<sub>3</sub>); <sup>1</sup>H NMR (CDCl<sub>3</sub>, TMS, 400 MHz)  $\delta$  7.39 (t, *J* = 8.0 Hz, 1H), 6.72 (d, *J* = 8.0 Hz, 1H), 6.62 (d, *J* = 8.0 Hz, 1H), 6.03-6.01 (m, 1H), 5.12-5.10 (m, 1H), 4.70-4.66 (m, 1H), 2.42 (s, 3H), 2.26-2.15 (m, 2H), 1.68 (d, *J* = 1.2 Hz, 3H), 1.62-1.51 (m, 1H), 1.38-1.30 (m, 1H); <sup>13</sup>C NMR (CDCl<sub>3</sub>, TMS, 100 MHz)  $\delta$  164.1, 155.9, 141.4, 137.5, 122.6, 115.9, 108.2, 70.6, 56.7, 25.3, 24.2, 20.5, 20.1. The product was analyzed by HPLC to determine the enantiomeric excess: 94% ee (chiralpak OD-H, *i*-propanol/hexane = 5/95, flow rate 1.0 mL/min,  $\lambda$  = 254 nm);  $t_r$  = 8.33 and 11.03 min.

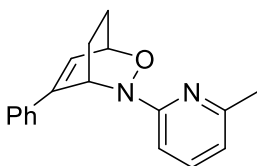

**3c** (known compound, see ref. 3)

**(1R,4S)-3-(6-methylpyridin-2-yl)-5-phenyl-2-oxa-3-azabicyclo[2.2.2]oct-5-ene:**

Yield (98%);  $[\alpha]_D^{25} = +111$  (*c* 1.10, CHCl<sub>3</sub>); <sup>1</sup>H NMR (CDCl<sub>3</sub>, TMS, 400 MHz)  $\delta$  7.55 (d, *J* = 8.0 Hz, 2H), 7.35-7.20 (m, 4H), 6.73 (d, *J* = 8.0 Hz, 1H), 6.65 (dd, *J* = 2.0, 6.0 Hz, 1H), 6.55 (d, *J* = 8.0 Hz, 1H), 5.79-5.78 (m, 1H), 4.90-4.88 (m, 1H), 2.41 (s, 3H), 2.36-2.29 (m, 2H), 1.71-1.64 (m, 1H), 1.47-1.41 (m, 1H); <sup>13</sup>C NMR (CDCl<sub>3</sub>, TMS, 100 MHz)  $\delta$  163.3, 155.8, 142.7, 137.6, 136.0, 128.2, 127.8, 125.5, 122.4, 116.1, 107.9, 70.0, 54.3, 24.6, 24.0, 20.9. The product was analyzed by HPLC to determine the enantiomeric excess: 96% ee (chiralpak OD-H, *i*-propanol/hexane = 5/95, flow rate 1.0 mL/min,  $\lambda$  = 254 nm);  $t_r$  = 12.90 and 19.07 min.

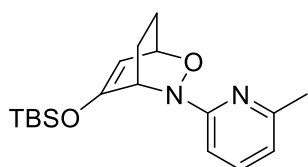

**3d** (known compound, see ref. 3)

**(1R,4S)-5-((tert-butyldimethylsilyl)oxy)-3-(6-methylpyridin-2-yl)-2-oxa-3-azabicyclo[2.2.2]oct-5-ene:** Yield (95%);  $[\alpha]_D^{25} = -64$  (*c* 0.91, CHCl<sub>3</sub>); <sup>1</sup>H NMR (CDCl<sub>3</sub>, TMS, 400 MHz)  $\delta$  7.38 (t, *J* = 8.0 Hz, 1H), 6.76 (d, *J* = 8.0 Hz, 1H), 6.63 (d, *J* = 8.0 Hz, 1H), 5.14 (dd, *J* = 2.8, 6.4 Hz, 1H), 5.06 (dd, *J* = 2.8, 6.4 Hz, 1H), 4.82-4.79 (m, 1H), 2.39 (s, 3H), 2.25-2.13 (m, 2H), 1.80-1.73 (m, 2H), 0.78 (s, 9H), 0.02 (s, 3H), -0.28 (s, 3H); <sup>13</sup>C NMR (CDCl<sub>3</sub>, TMS, 100 MHz)  $\delta$  164.0, 156.3, 153.3, 137.6, 116.4, 108.1, 100.3, 72.0, 58.6, 26.3, 25.3, 24.3, 21.1, 17.8, -4.6, -5.8. The product was analyzed by HPLC to determine the enantiomeric excess: 95% ee (chiralpak OD-H, *i*-propanol/hexane = 5/95, flow rate 1.0 mL/min,  $\lambda$  = 254 nm);  $t_r$  = 6.68 and 9.45 min.

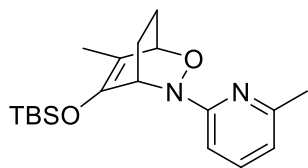

**3e**

**(1R,4S)-5-((tert-butyldimethylsilyl)oxy)-6-methyl-3-(6-methylpyridin-2-yl)-2-oxa-3-azabicyclo[2.2.2]oct-5-ene:** Yield (92%);  $[\alpha]_D^{25} = -82$  (*c* 0.73, CHCl<sub>3</sub>); <sup>1</sup>H NMR

(CDCl<sub>3</sub>, TMS, 400 MHz)  $\delta$  7.39 (t,  $J$  = 8.0 Hz, 1H), 6.73 (d,  $J$  = 8.0 Hz, 1H), 6.63 (d,  $J$  = 8.0 Hz, 1H), 5.01-4.99 (m, 1H), 4.65-4.63 (m, 1H), 2.41 (s, 3H), 2.24-2.12 (m, 2H), 1.69 (s, 3H), 1.44-1.38 (m, 1H), 0.86 (s, 9H), 0.05 (s, 3H), -0.02 (s, 3H); <sup>13</sup>C NMR (CDCl<sub>3</sub>, TMS, 100 MHz)  $\delta$  163.7, 156.2, 145.9, 137.7, 116.3, 112.8, 107.9, 76.8, 58.3, 26.1, 25.5, 24.2, 22.1, 18.0, 11.9, -4.3, -4.5. IR (KBr)  $\nu$  2955, 2928, 2856, 2341, 1681, 1589, 1576, 1450, 1259, 1213, 1200, 931, 839, 783, 681, 668 cm<sup>-1</sup>. HRMS Calcd. For C<sub>19</sub>H<sub>31</sub>O<sub>2</sub>N<sub>2</sub>Si<sup>+</sup>: 347.2149, found: 347.2149. The product was analyzed by HPLC to determine the enantiomeric excess: 97% ee (chiralpak OD-H, *i*-propanol/hexane = 5/95, flow rate 1.0 mL/min,  $\lambda$  = 254 nm);  $t_r$  = 5.51 and 8.33 min.

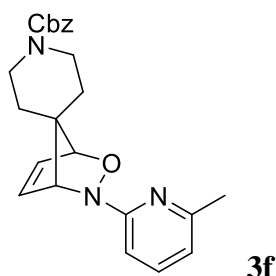

**benzyl (1S,4R)-3-(6-methylpyridin-2-yl)-2-oxa-3-azaspiro[bicyclo[2.2.1]heptane-7,4'-piperidin]-5-ene-1'-carboxylate:** Yield (96%);  $[\alpha]_D^{25} = -89$  (c 0.83, CHCl<sub>3</sub>); <sup>1</sup>H NMR (CDCl<sub>3</sub>, TMS, 400 MHz)  $\delta$  7.38-7.30 (m, 6H), 6.63 (d,  $J$  = 8.0 Hz, 1H), 6.57 (d,  $J$  = 8.0 Hz, 1H), 6.23-6.21 (m, 1H), 6.01-5.98 (m, 1H), 5.15-5.13 (m, 3H), 4.74-4.72 (m, 1H), 3.68-3.52 (m, 2H), 3.50-3.37 (m, 2H), 2.42 (s, 3H), 2.05-1.93 (m, 2H), 1.60-1.54 (m, 2H); <sup>13</sup>C NMR (CDCl<sub>3</sub>, TMS, 100 MHz)  $\delta$  162.9, 156.4, 137.6, 136.7, 134.2, 130.1, 128.4, 127.9, 127.8, 116.4, 108.6, 86.1, 70.4, 67.0, 60.0, 42.1, 41.6, 29.1, 29.0, 24.3. IR (KBr)  $\nu$  2960, 2924, 2852, 1589, 1579, 1450, 1330, 1260, 1230, 1021, 926, 853, 799, 736 cm<sup>-1</sup>. HRMS Calcd. For C<sub>23</sub>H<sub>26</sub>O<sub>3</sub>N<sub>3</sub><sup>+</sup>: 392.1969, found: 392.1971. The product was analyzed by HPLC to determine the enantiomeric excess: 90% ee (chiralpak OD-H, *i*-propanol/hexane = 20/80, flow rate 1.0 mL/min,  $\lambda$  = 254 nm);  $t_r$  = 10.92 and 20.60 min.

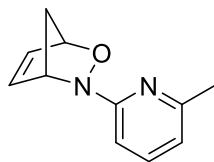

**3g** (known compound, see ref. 3)

**(1R,4S)-3-(6-methylpyridin-2-yl)-2-oxa-3-azabicyclo[2.2.1]hept-5-ene:**

Yield (90%);  $[\alpha]^{25}_D = -114$  (*c* 0.95,  $\text{CHCl}_3$ );  $^1\text{H NMR}$  ( $\text{CDCl}_3$ , TMS, 400 MHz)  $\delta$  7.39 (t,  $J = 8.0$  Hz, 1H), 6.65 (t,  $J = 8.0$  Hz, 2H), 6.32-6.30 (m, 1H), 6.12-6.09 (m, 1H), 5.52-5.50 (m, 1H), 5.21-5.19 (m, 1H), 2.44 (s, 3H), 2.12 (dt,  $J = 2.0, 8.4$  Hz, 1H), 1.80 (d,  $J = 8.4$  Hz, 1H);  $^{13}\text{C NMR}$  ( $\text{CDCl}_3$ , TMS, 100 MHz)  $\delta$  163.2, 156.4, 137.6, 134.9, 132.3, 116.5, 108.9, 82.7, 66.8, 47.9, 24.2. The product was analyzed by HPLC to determine the enantiomeric excess: 87% ee (chiralpak OD-H, *i*-propanol/hexane = 5/95, flow rate 1.0 mL/min,  $\lambda = 254$  nm);  $t_r = 9.27$  and 12.71 min.

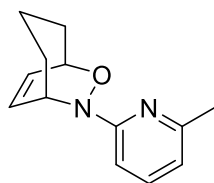

**3h** (known compound, see ref. 3)

**(1S,5R)-7-(6-methylpyridin-2-yl)-6-oxa-7-azabicyclo[3.2.2]non-8-ene:** Yield (90%);

$[\alpha]^{25}_D = -167$  (*c* 0.57,  $\text{CH}_2\text{Cl}_2$ );  $^1\text{H NMR}$  ( $\text{CDCl}_3$ , TMS, 400 MHz)  $\delta$  7.41 (t,  $J = 8.0$  Hz, 1H), 6.80 (d,  $J = 8.0$  Hz, 1H), 6.60 (d,  $J = 8.0$  Hz, 1H), 6.19-6.14 (m, 1H), 6.06-6.01 (m, 1H), 5.38-5.33 (m, 1H), 4.81-4.77 (m, 1H), 2.40 (s, 3H), 2.06-1.89 (m, 3H), 1.76-1.70 (m, 1H), 1.64-1.56 (m, 1H), 1.48-1.36 (m, 1H);  $^{13}\text{C NMR}$  ( $\text{CDCl}_3$ , TMS, 100 MHz)  $\delta$  163.5, 156.3, 137.7, 130.4, 125.6, 115.5, 107.6, 73.4, 57.0, 31.6, 27.1, 24.3, 18.7. The product was analyzed by HPLC to determine the enantiomeric excess: 71% ee (chiralpak OD-H, *i*-propanol/hexane = 5/95, flow rate 1.0 mL/min,  $\lambda = 254$  nm);  $t_r = 6.78$  and 7.79 min.

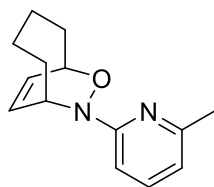

**3i**

**(1S,6R)-8-(6-methylpyridin-2-yl)-7-oxa-8-azabicyclo[4.2.2]dec-9-ene:** Yield (80%);

$[\alpha]_D^{25} = -77$  (c 0.61 CH<sub>2</sub>Cl<sub>2</sub>); <sup>1</sup>H NMR (CDCl<sub>3</sub>, TMS, 400 MHz) δ 7.44 (t, *J* = 8.0 Hz, 1H), 6.88 (d, *J* = 8.0 Hz, 1H), 6.61 (d, *J* = 8.0 Hz, 1H), 6.28 (d, *J* = 10.0 Hz, 1H), 6.26 (d, *J* = 10.0 Hz, 1H), 5.71 (d, *J* = 10.0 Hz, 1H), 5.70 (d, *J* = 10.0 Hz, 1H), 5.26-5.22 (m, 1H), 4.95-4.92 (m, 1H), 2.40 (s, 3H), 2.32-2.25 (m, 1H), 2.20-2.07 (m, 2H), 1.91-1.60 (m, 6H); <sup>13</sup>C NMR (CDCl<sub>3</sub>, TMS, 100 MHz) δ 163.2, 156.5, 137.9, 131.9, 125.5, 115.4, 106.8, 73.0, 54.6, 34.8, 32.0, 26.2, 24.4, 22.3. IR (KBr) ν 2917, 2854, 1589, 1576, 1447, 1283, 1231, 1178, 972, 830. 783, 637 cm<sup>-1</sup>. HRMS Calcd. For C<sub>14</sub>H<sub>19</sub>ON<sub>2</sub><sup>+</sup>: 231.1492, found: 231.1488. The product was analyzed by HPLC to determine the enantiomeric excess: 80% ee (chiralpak AD-H, *i*-propanol/hexane = 5/95, flow rate 1.0 mL/min, λ = 254 nm); t<sub>r</sub> = 5.20 and 7.29 min.

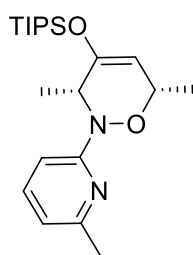

**3j** (known compound, see ref. 3)

**(3*R*,6*S*)-3,6-dimethyl-2-(6-methylpyridin-2-yl)-4-((triisopropylsilyl)oxy)-3,6-dihydro-2*H*-1,2-oxazine**: Yield (93%);  $[\alpha]_D^{25} = -134$  (c 1.09, CHCl<sub>3</sub>); <sup>1</sup>H NMR (CDCl<sub>3</sub>, TMS, 400 MHz) δ 7.44 (t, *J* = 8.0 Hz, 1H), 6.91 (d, *J* = 8.0 Hz, 1H), 6.59 (d, *J* = 8.0 Hz, 1H), 4.79-4.66 (m, 3H), 2.41 (s, 3H), 1.29-1.19 (m, 9H), 1.12 (s, 12H), 1.10 (s, 6H); <sup>13</sup>C NMR (CDCl<sub>3</sub>, TMS, 100 MHz) δ 159.3, 156.6, 152.5, 137.7, 114.7, 106.2, 102.9, 71.9, 54.2, 24.4, 20.0, 18.0, 14.2, 12.6. The product was analyzed by HPLC to determine the enantiomeric excess: 96% ee (chiralpak OD-H, *i*-propanol/hexane = 0/100, flow rate 1.0 mL/min, λ = 254 nm); t<sub>r</sub> = 8.75 and 15.06 min.

### III. References

1. a) A. S. E. Karlstrom, M. Ronn, A. Thorarensen and J. E. Backvall, *J. Org. Chem.* 1998, **63**, 2517-2522; (b) M. E. Jung and M. A. Guzaev, *Org. Lett.*, 2012, **14**, 5169-5171; (c) W. Lin, A. Gupta, K. H. Kim, D. Mendel and M. J. Miller, *Org. Lett.* 2009, **11**, 449-452; (d) M. Arisawa, Y. Torisawa, M. Kawahara and M. Nakagawa, *J. Org. Chem.* 1997, **62**, 4327-4329; (e) A. G. Dossetter, T. F. Jamison and E. N. Jacobsen, *Angew. Chem. Int. Ed.* 1999, **43**, 2398-2400.
2. (a) G. G. Moskalenko, V. F. Sedova and V. P. Mamaev, *Chem. Heterocycl. Compd.* 1989, **25**, 805-811; (b) G. G. Moskalenko, V. F. Sedova, and V. P. Mamaev, *Chem. Heterocycl. Compd.* 1986, **22**, 1232-1236; (c) E. C. Taylor, C. P. Tseng and J. B. Rampal, *J. Org. Chem.* 1982, **47**, 552-555.
3. (a) B. Maji and H. Yamamoto, *J. Am. Chem. Soc.*, 2015, **137**, 15957-15963; (b) Y. Yamamoto and H. Yamamoto, *Angew. Chem., Int. Ed.*, 2005, **44**, 7082-7085; (c). Y. Yamamoto and H. Yamamoto, *J. Am. Chem. Soc.*, 2004, **126**, 4128-4129.



#### IV. $^1\text{H}$ NMR and $^{13}\text{C}$ NMR Spectra

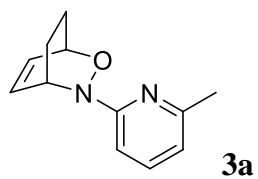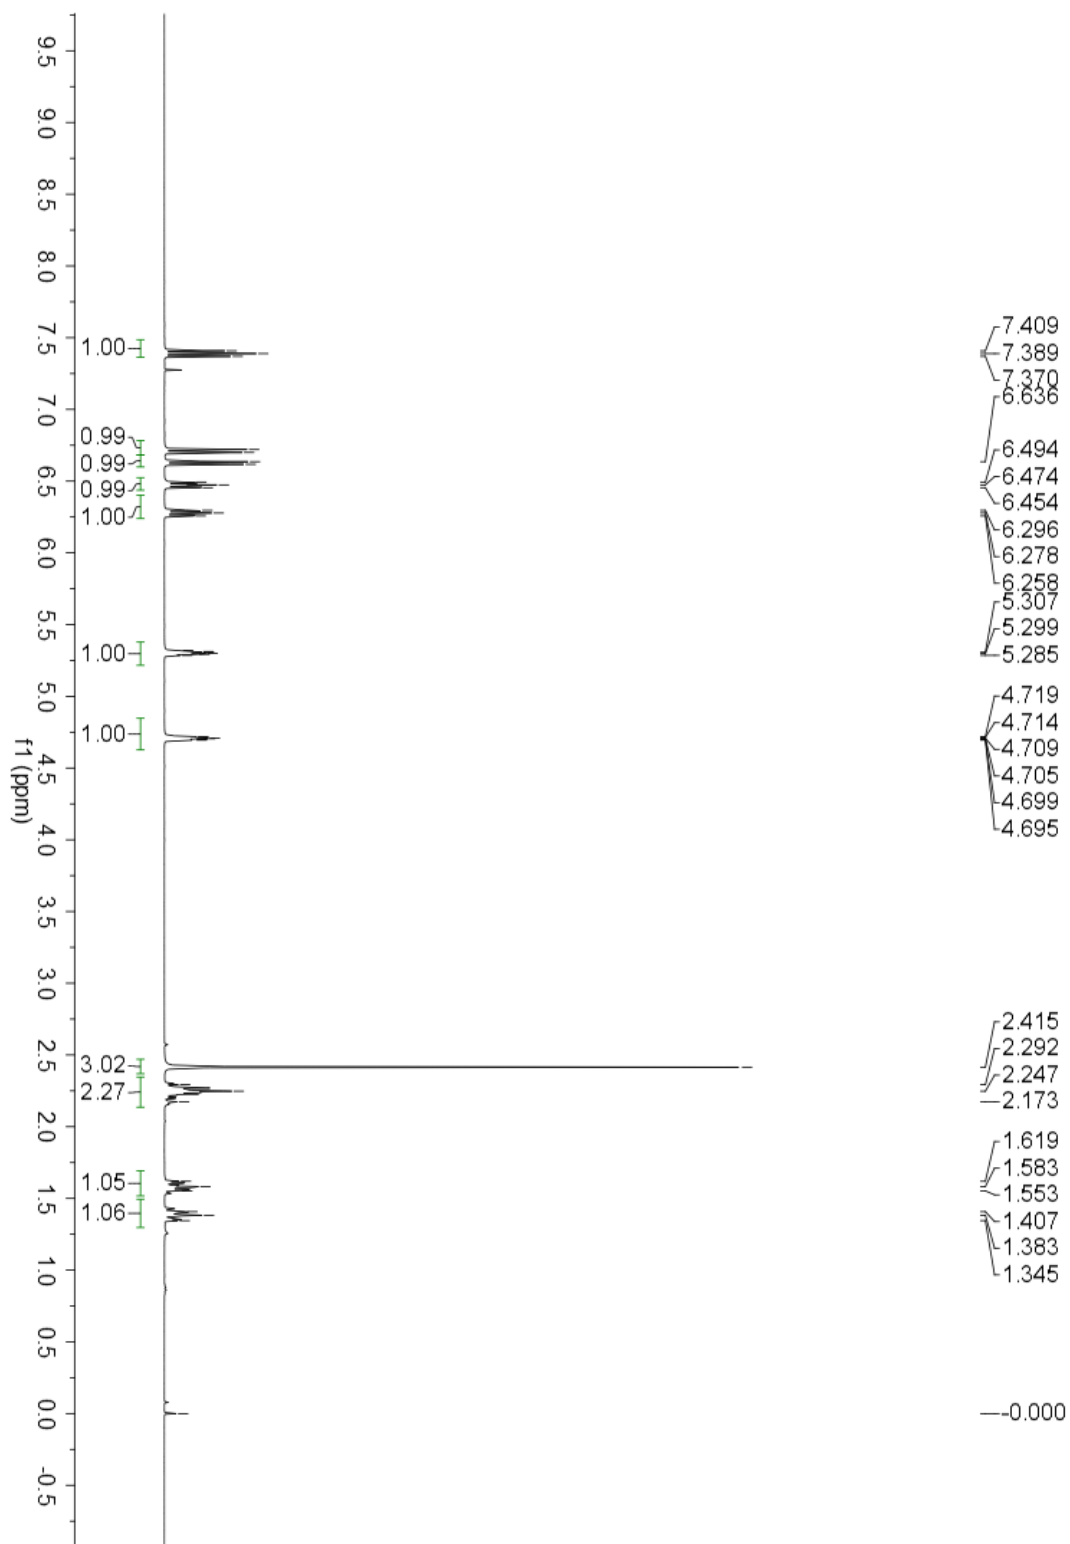

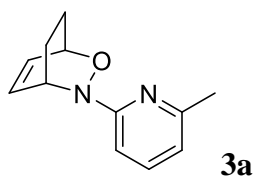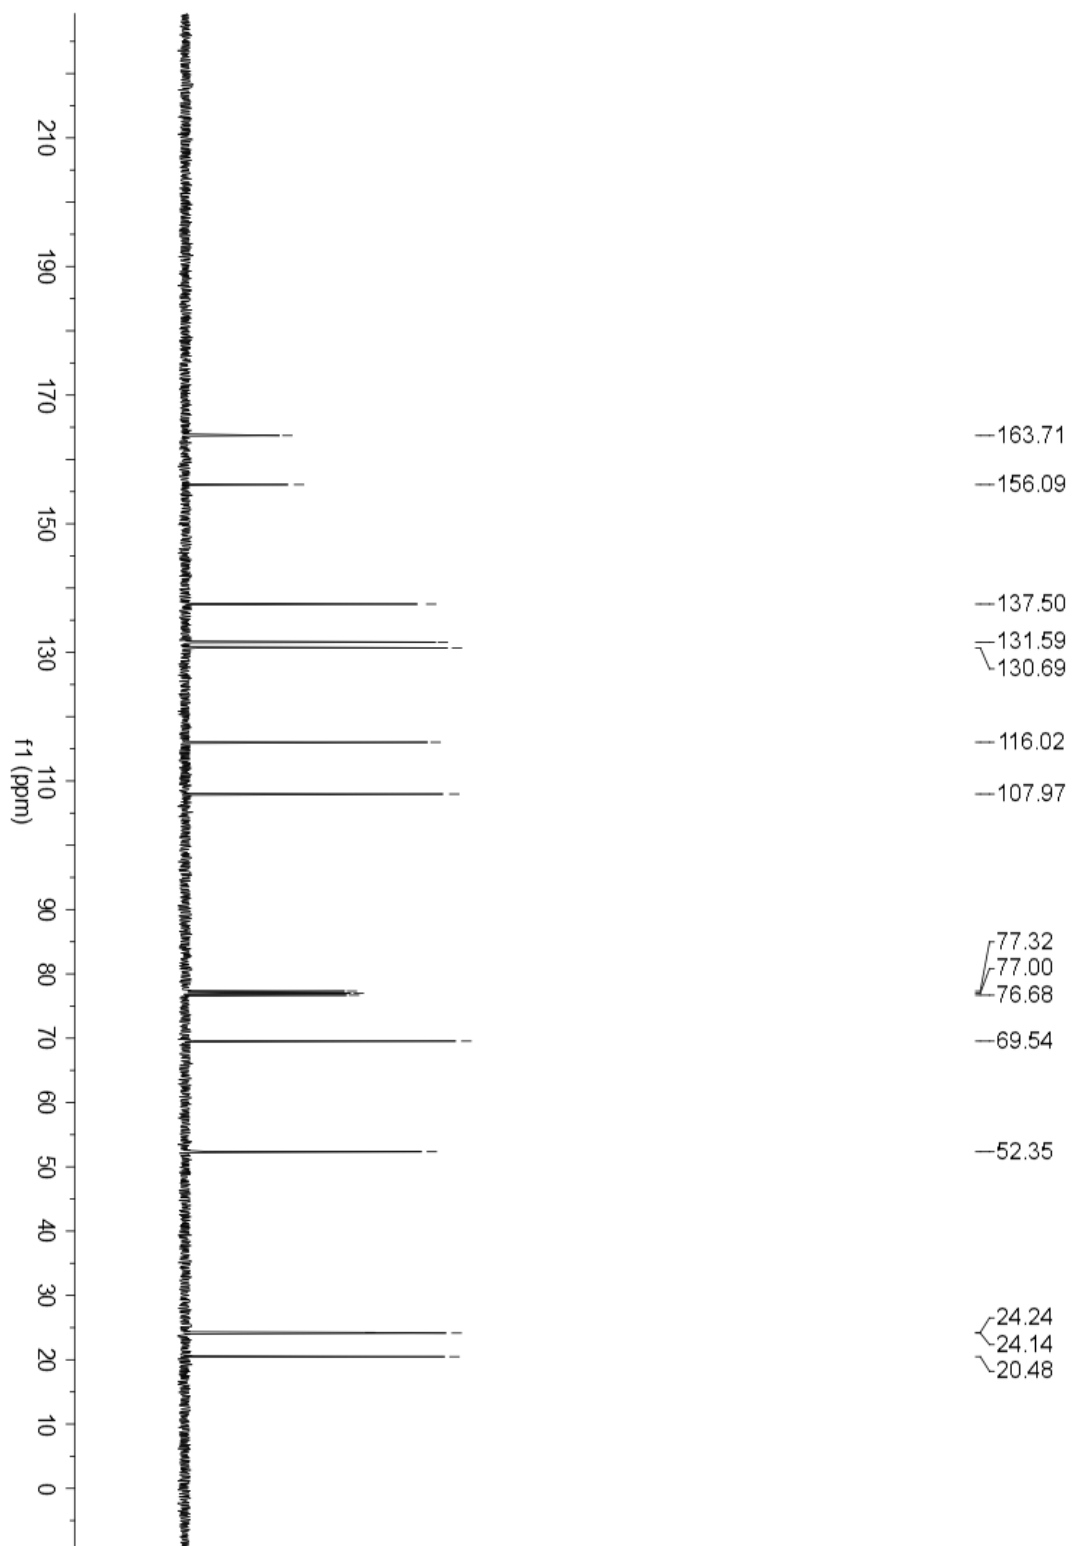

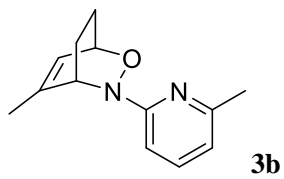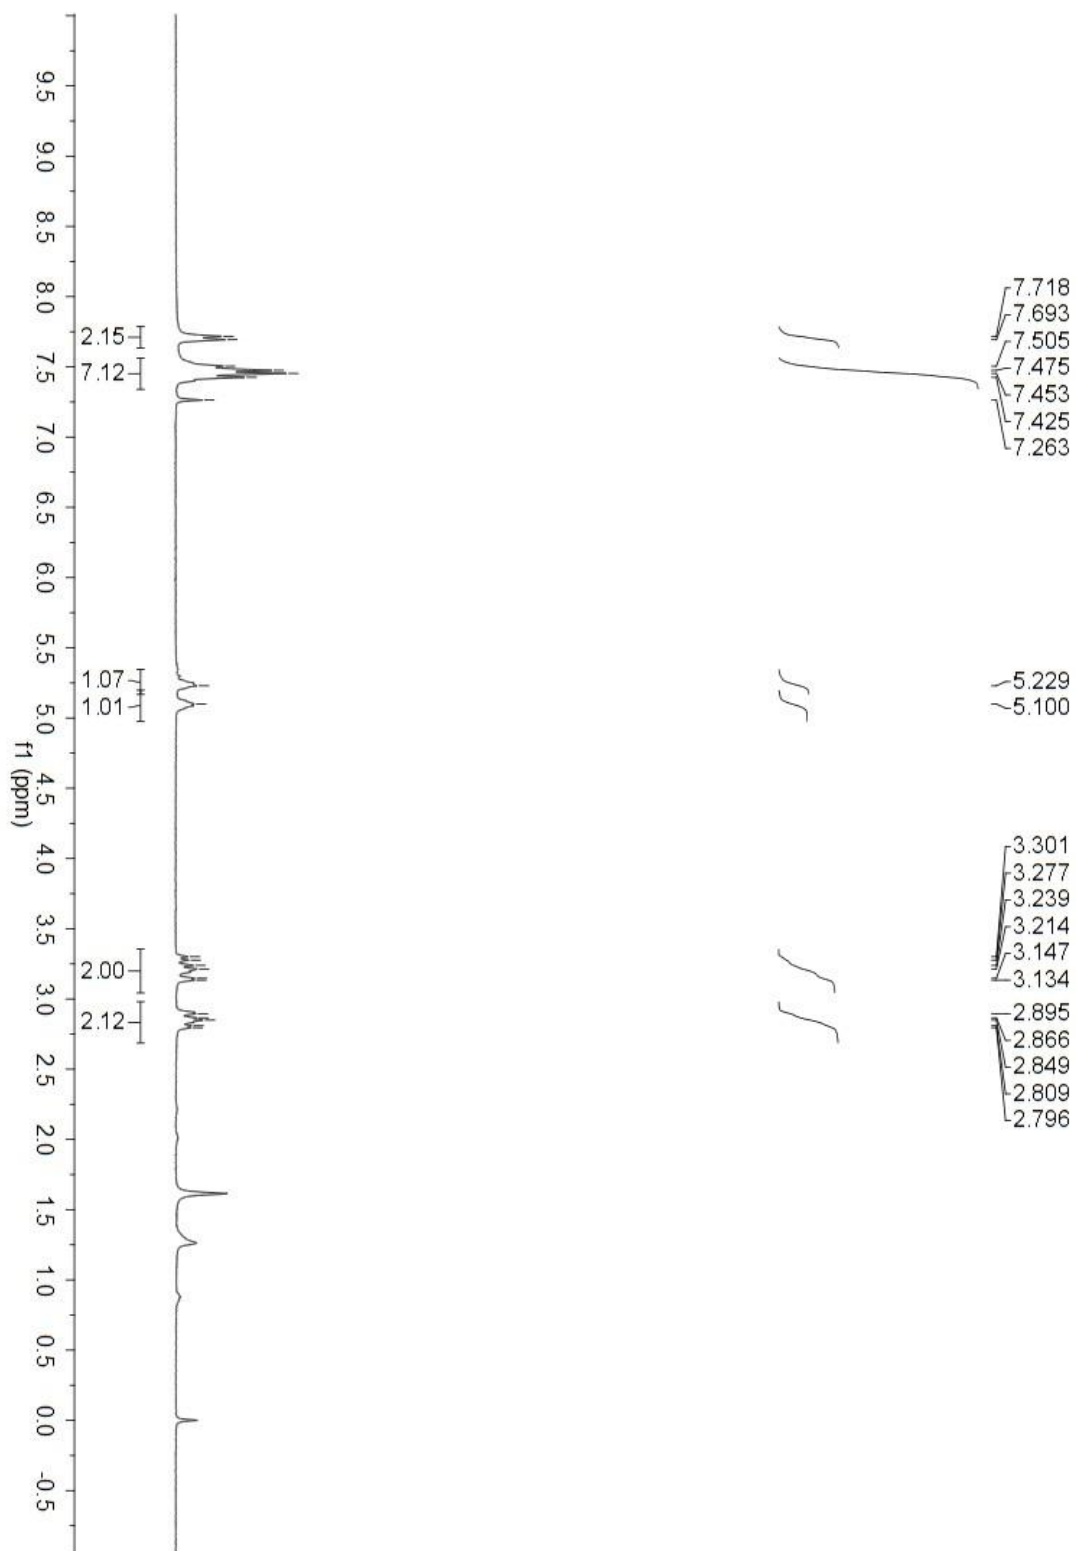

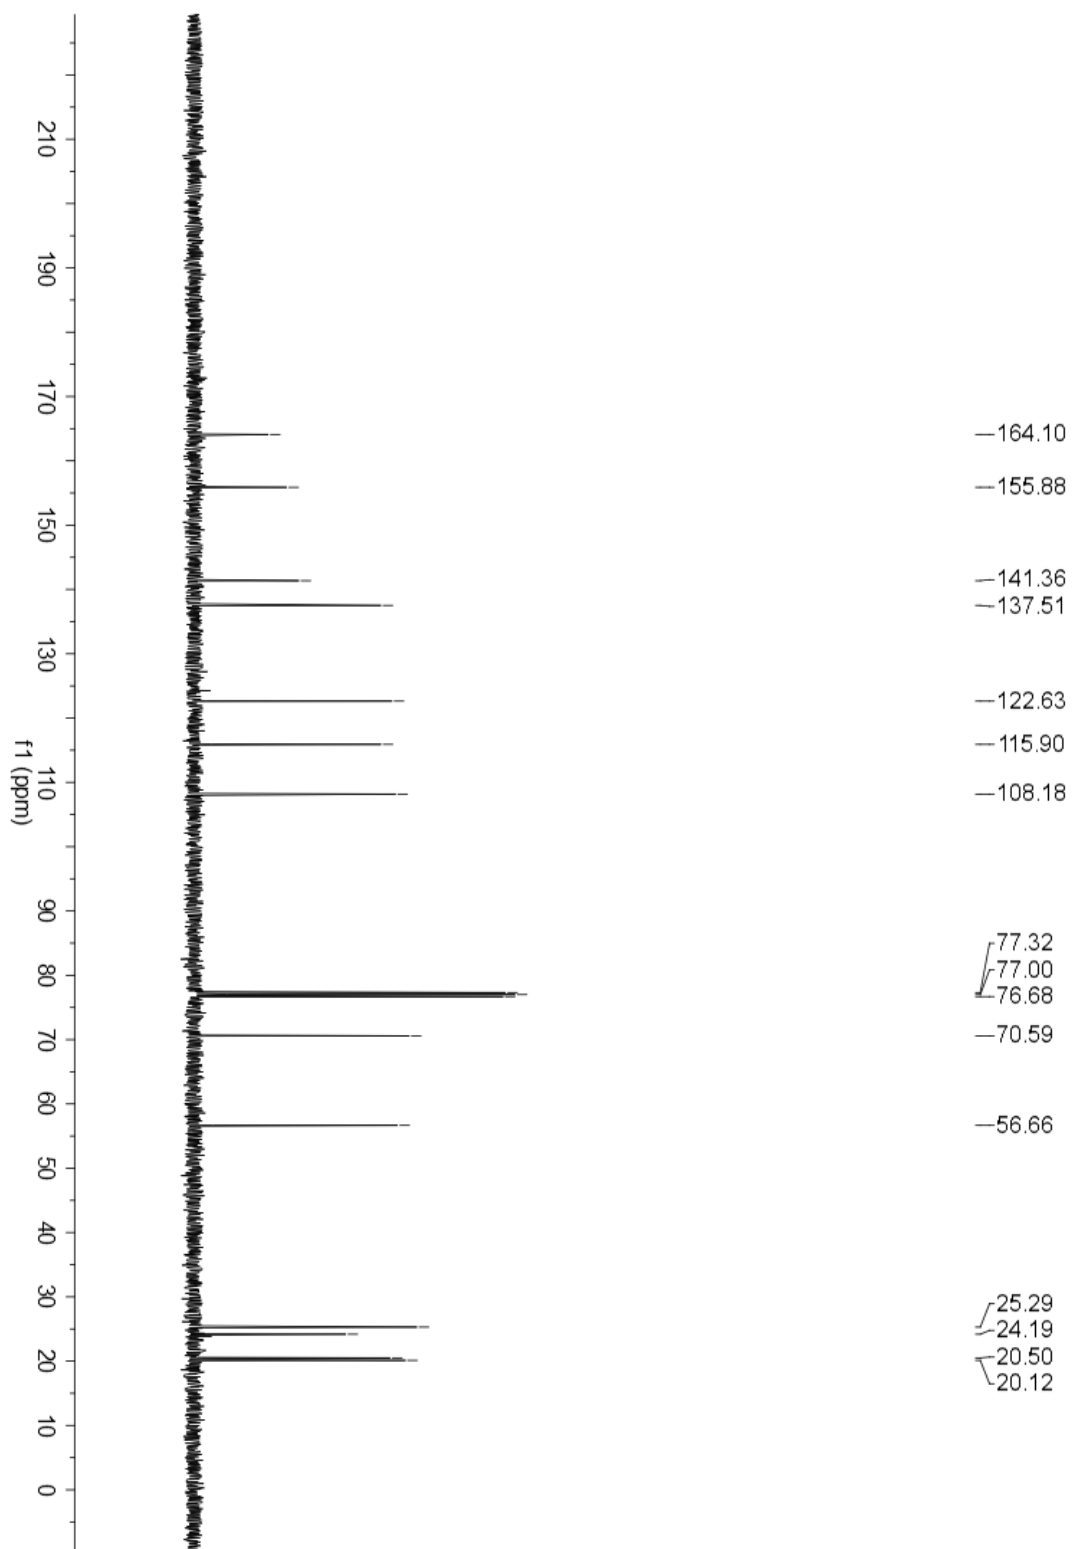

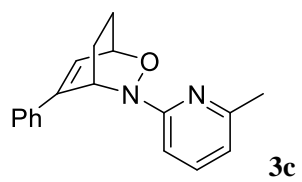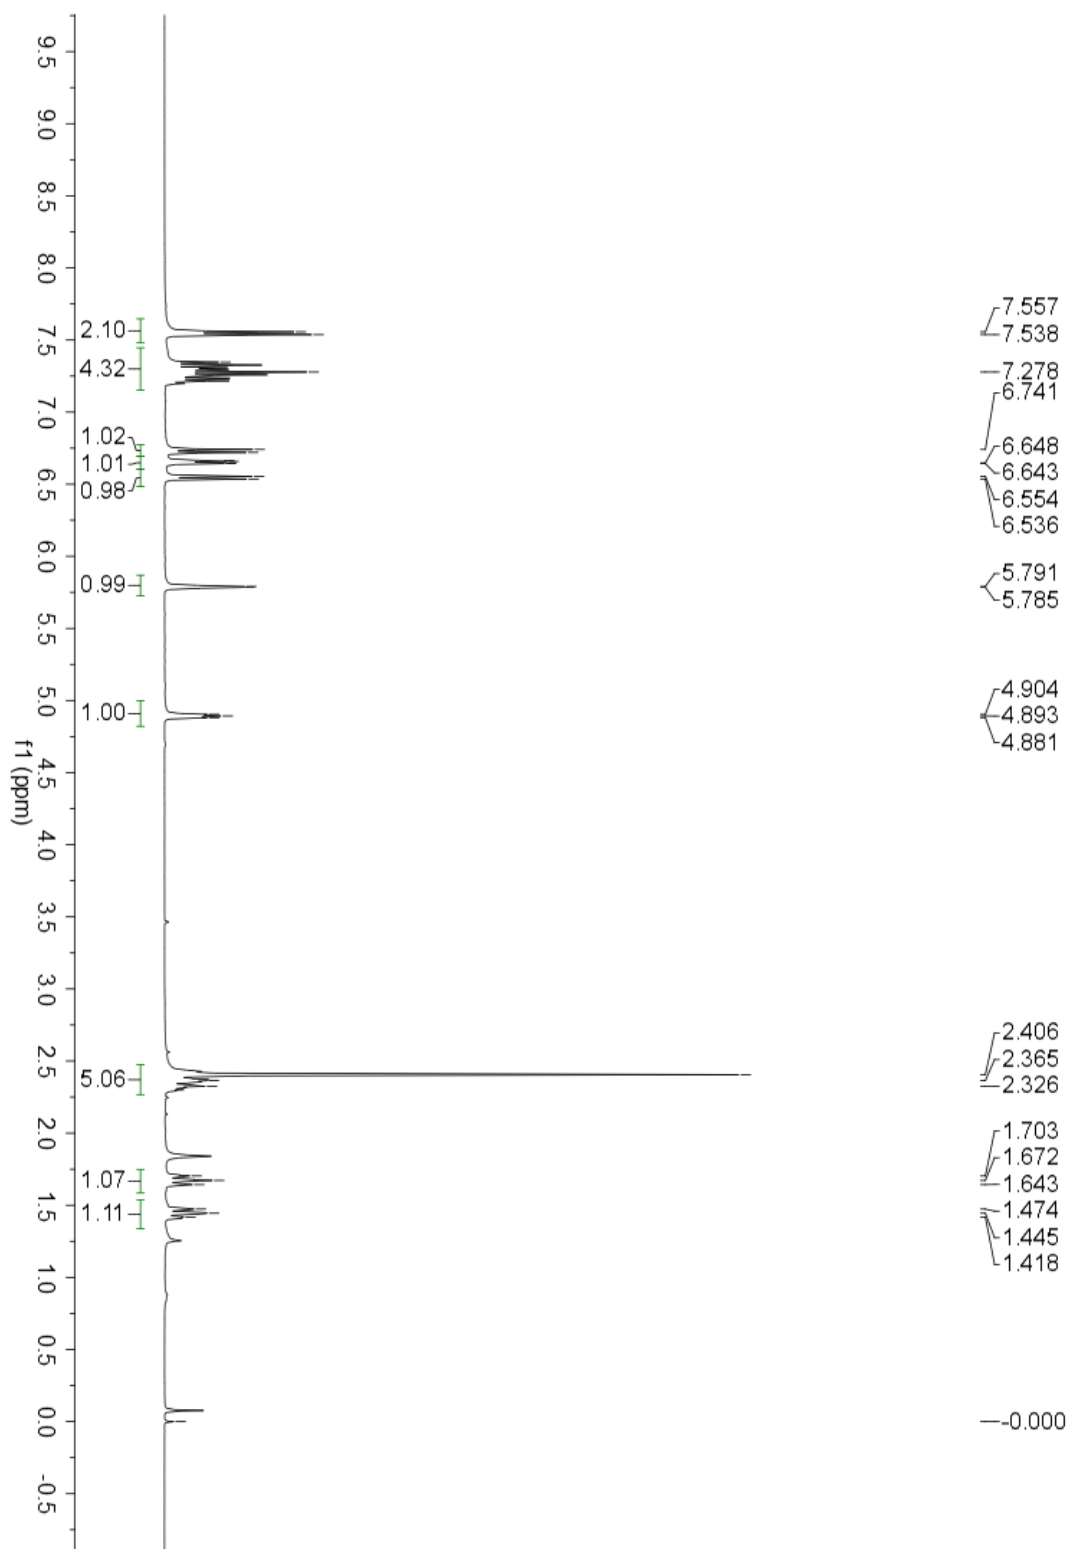

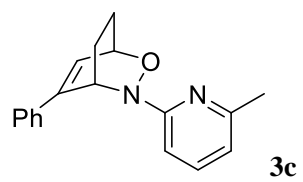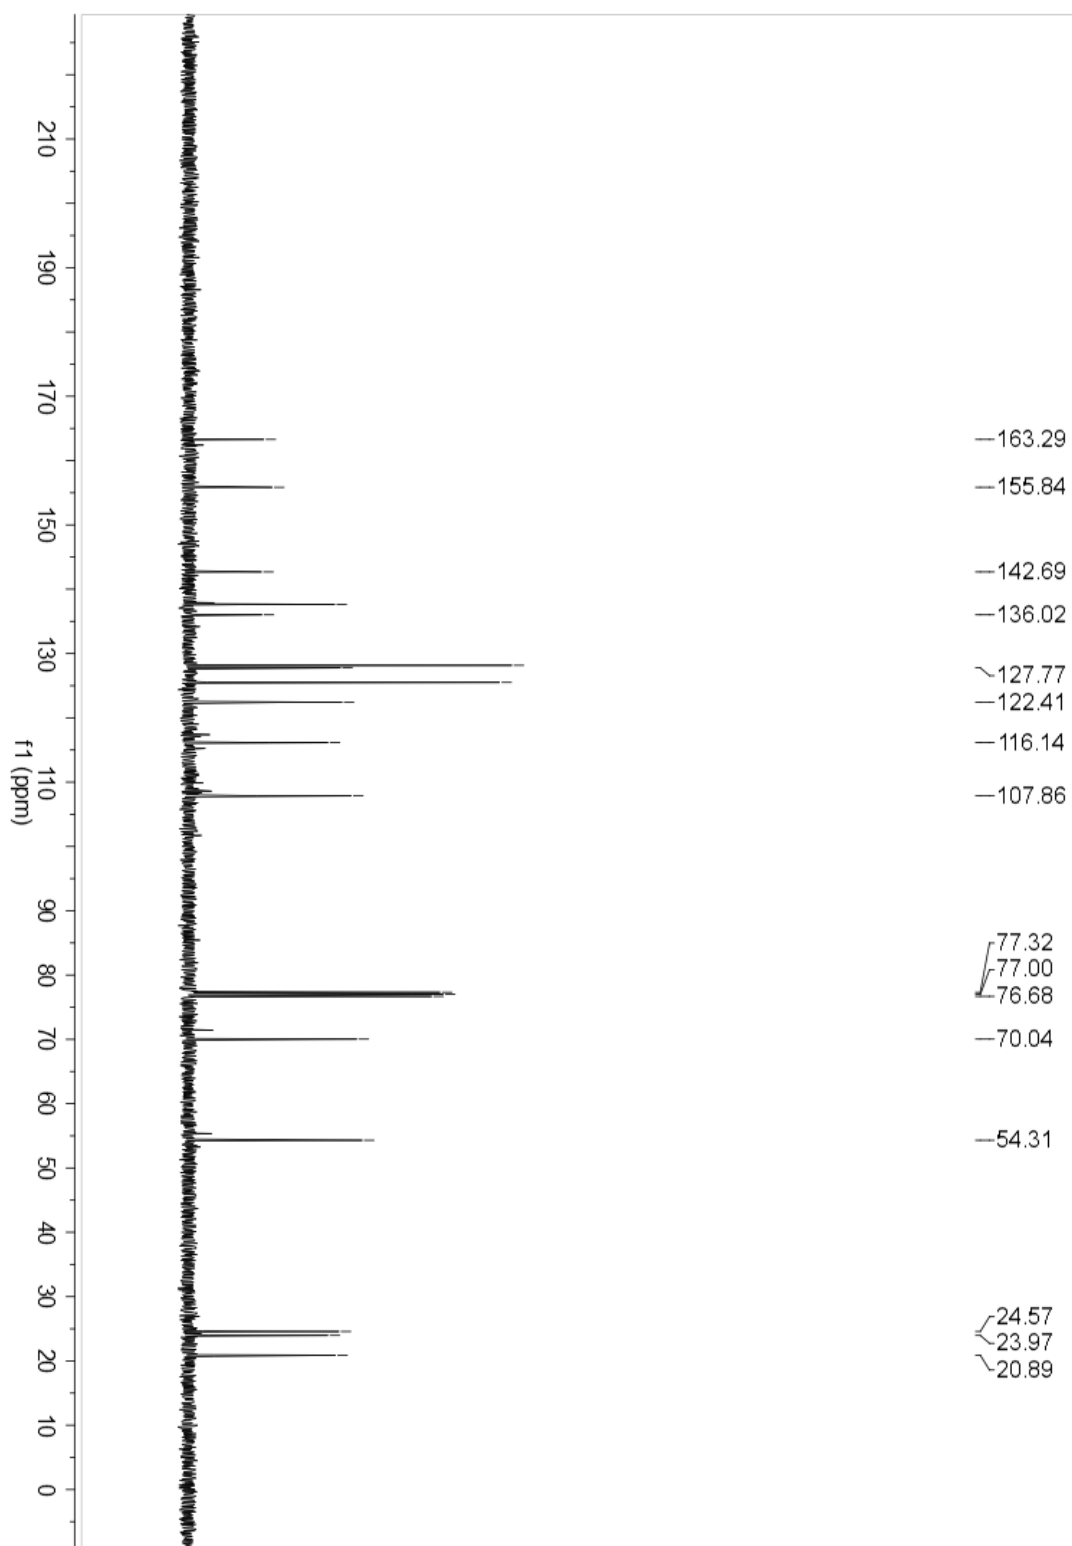

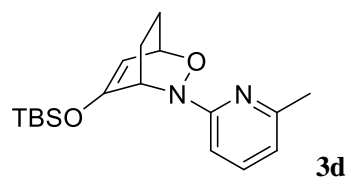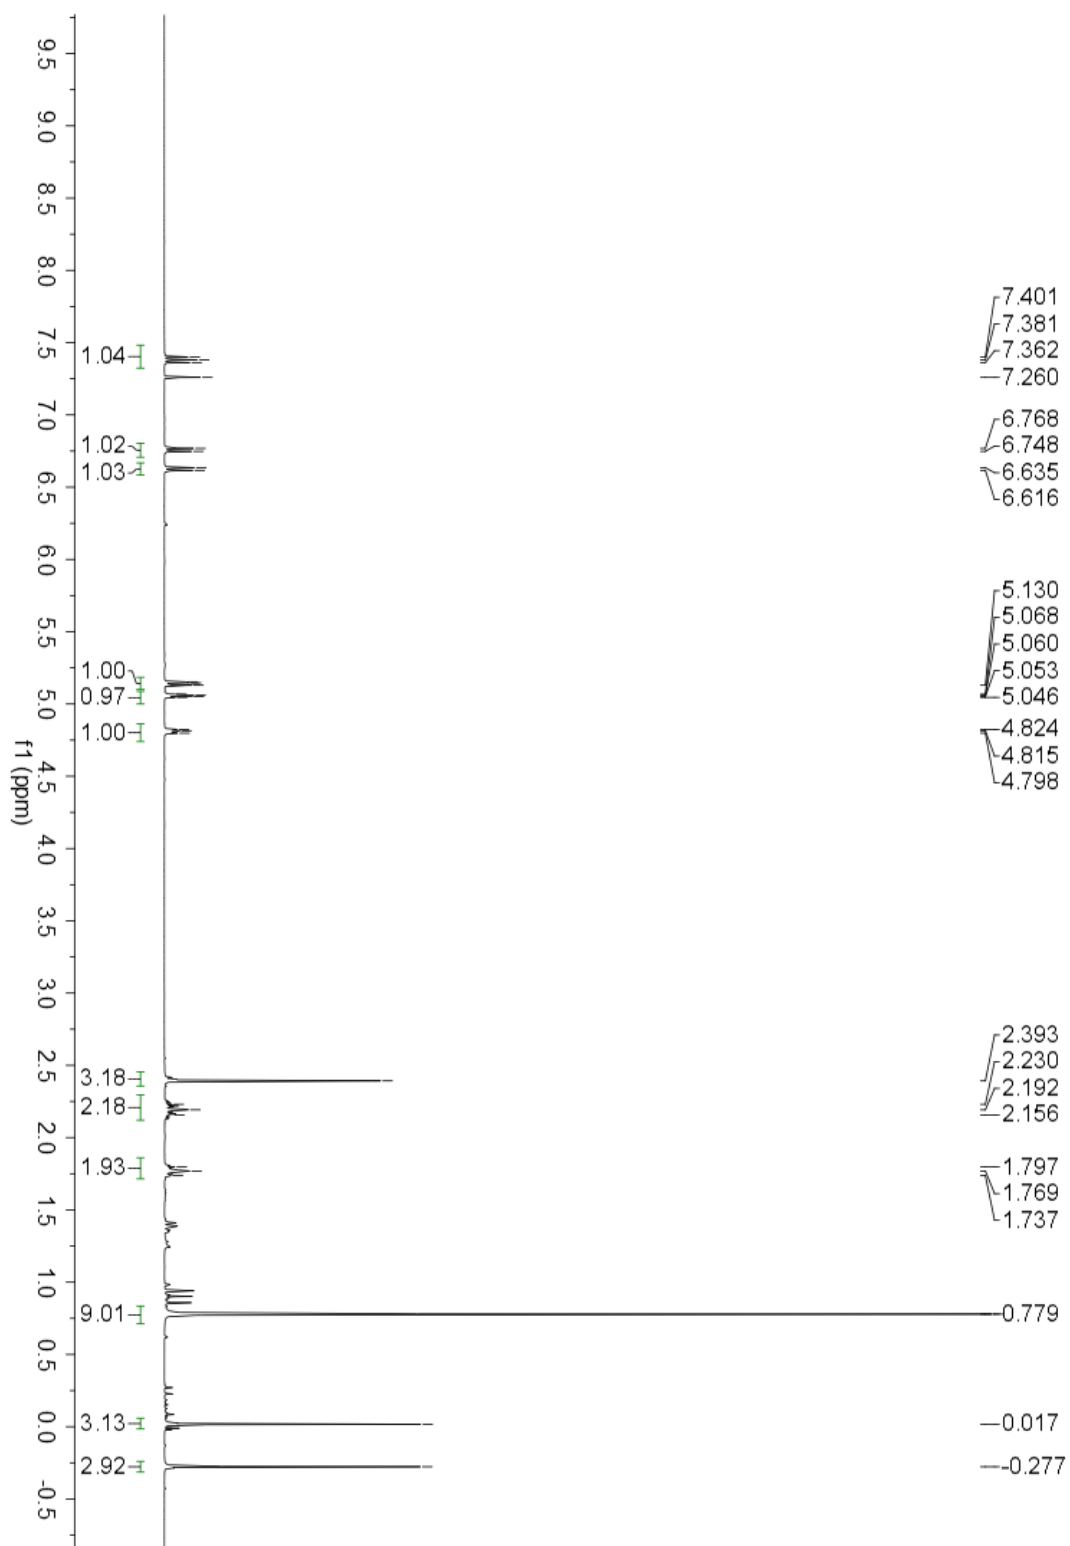

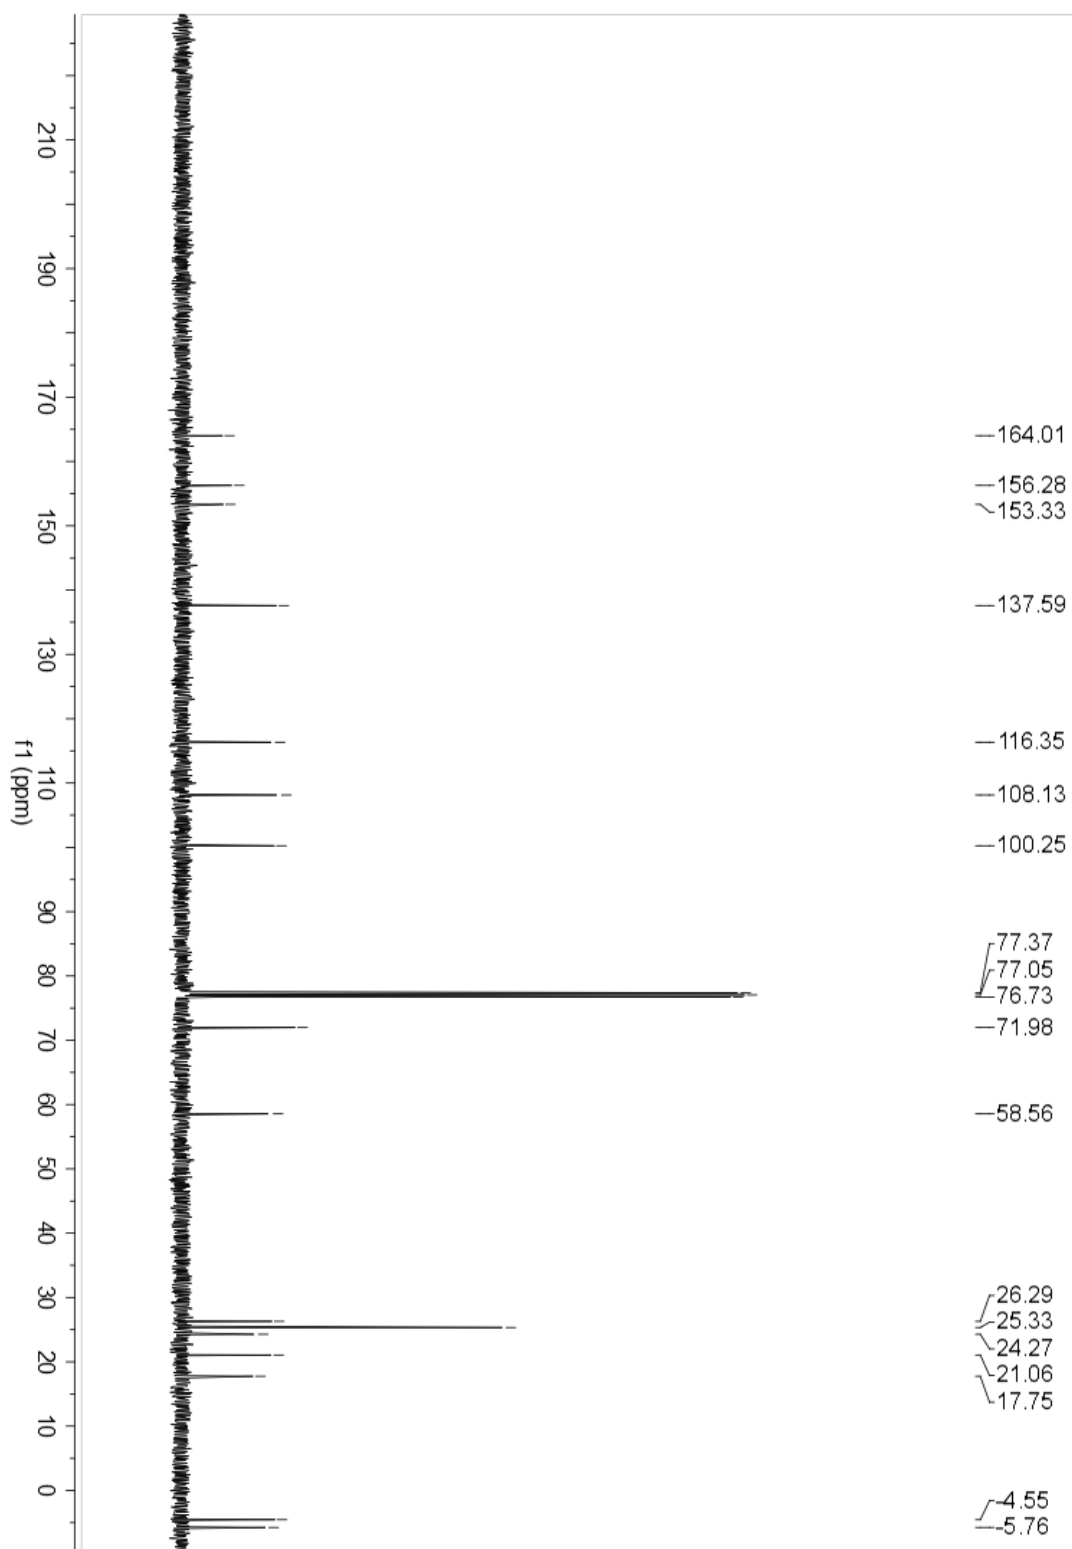



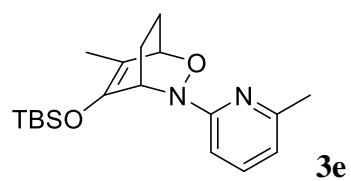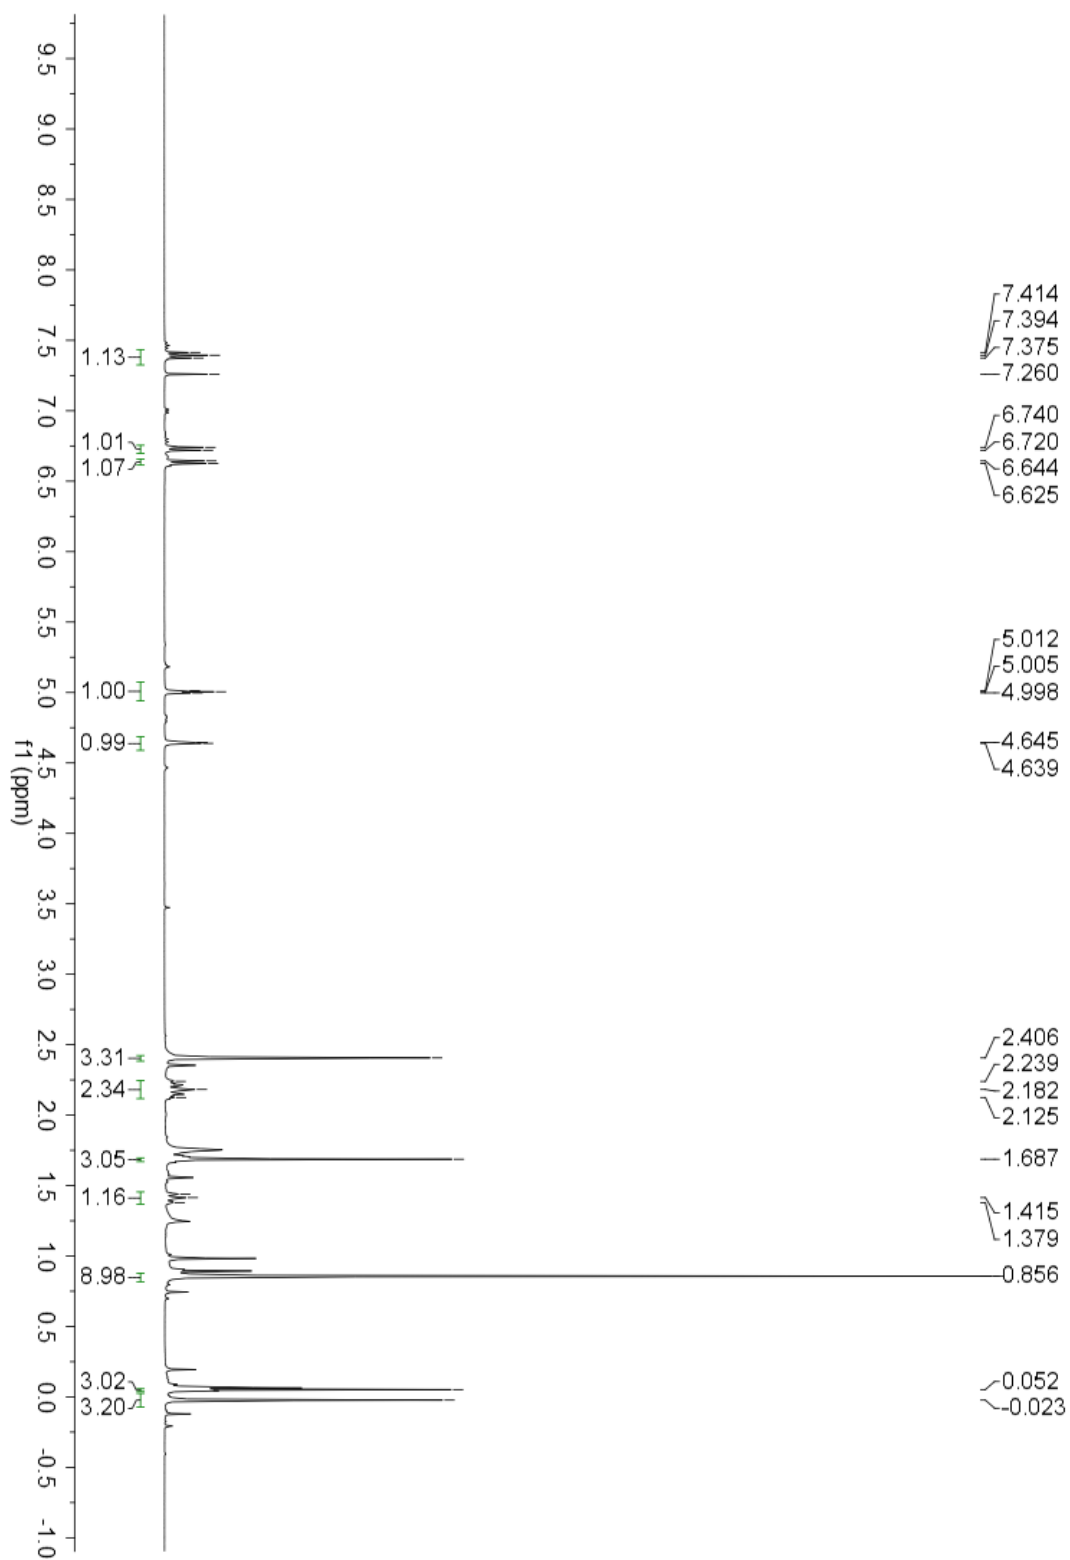

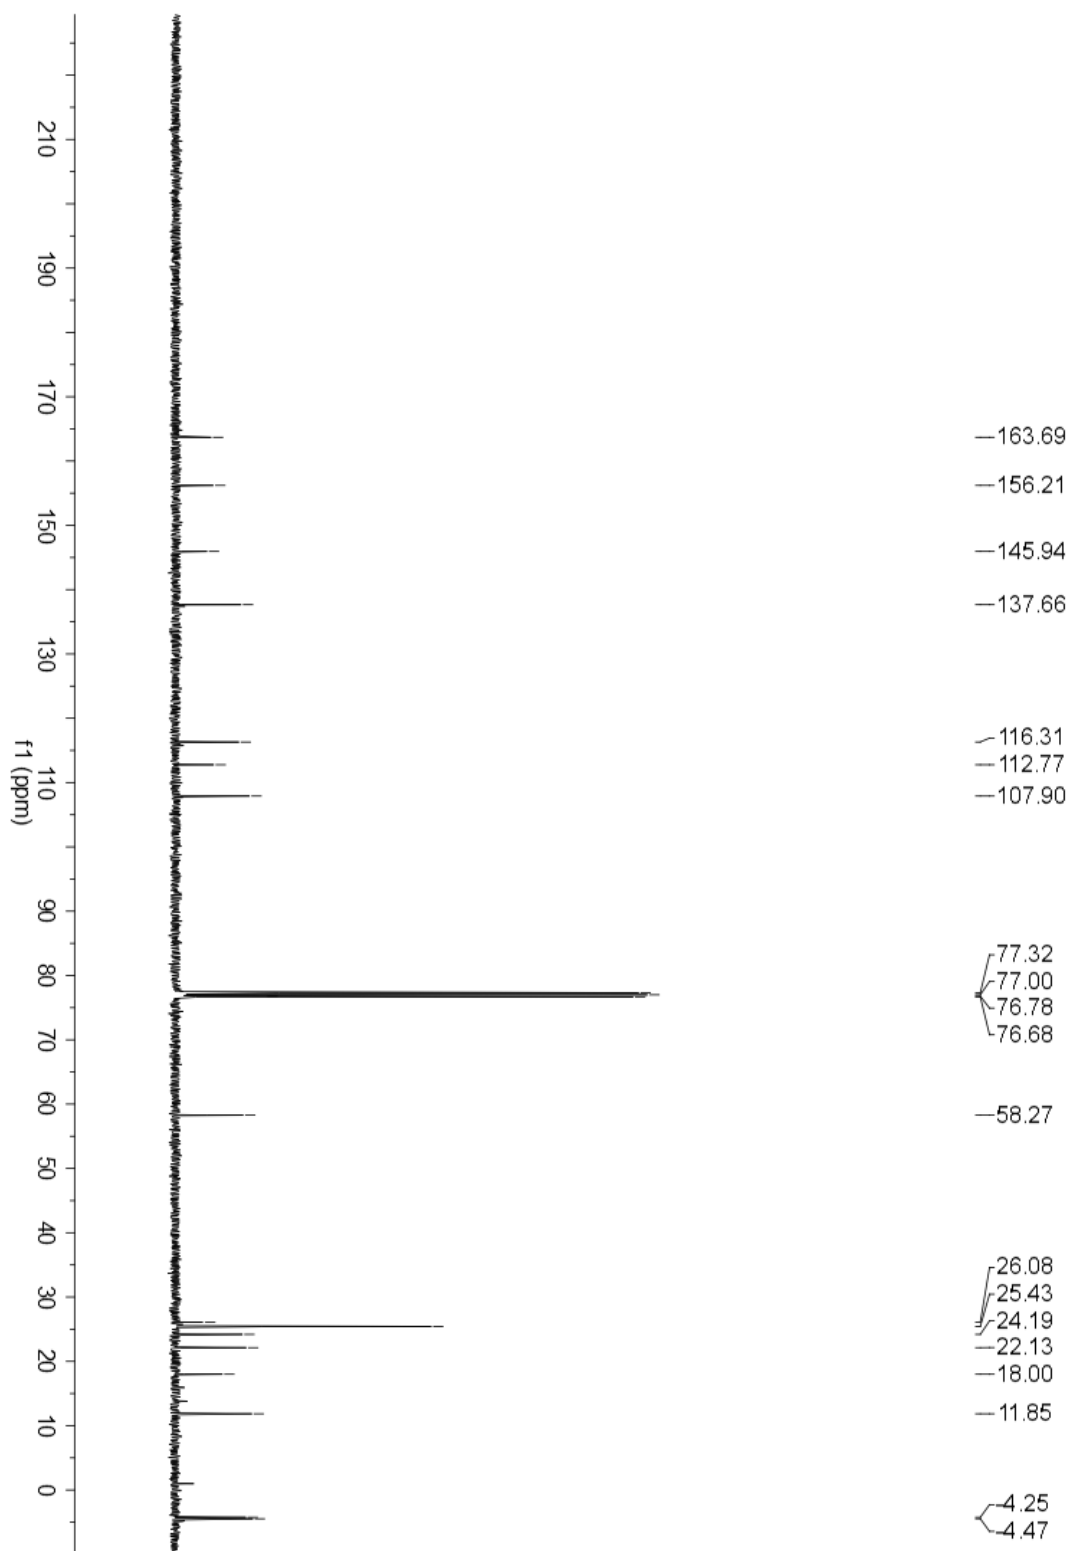

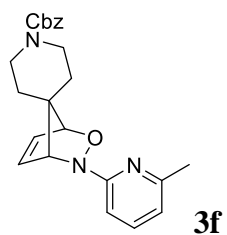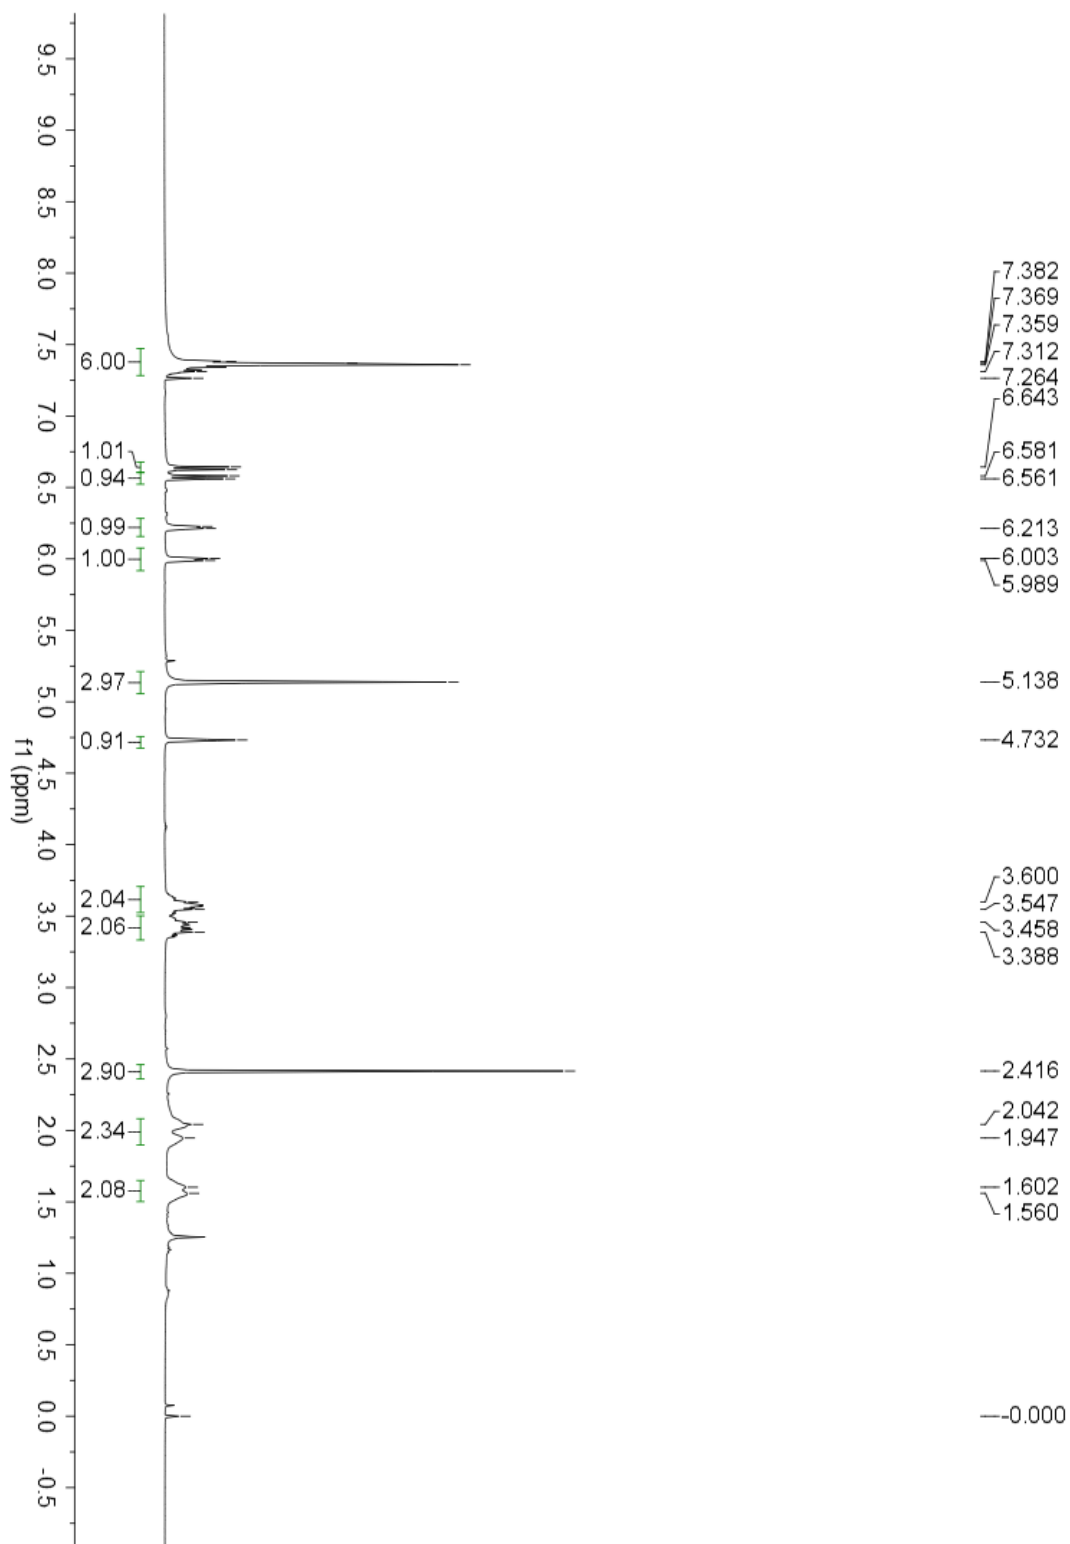

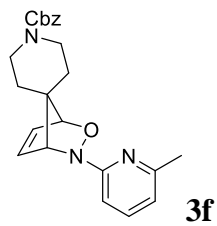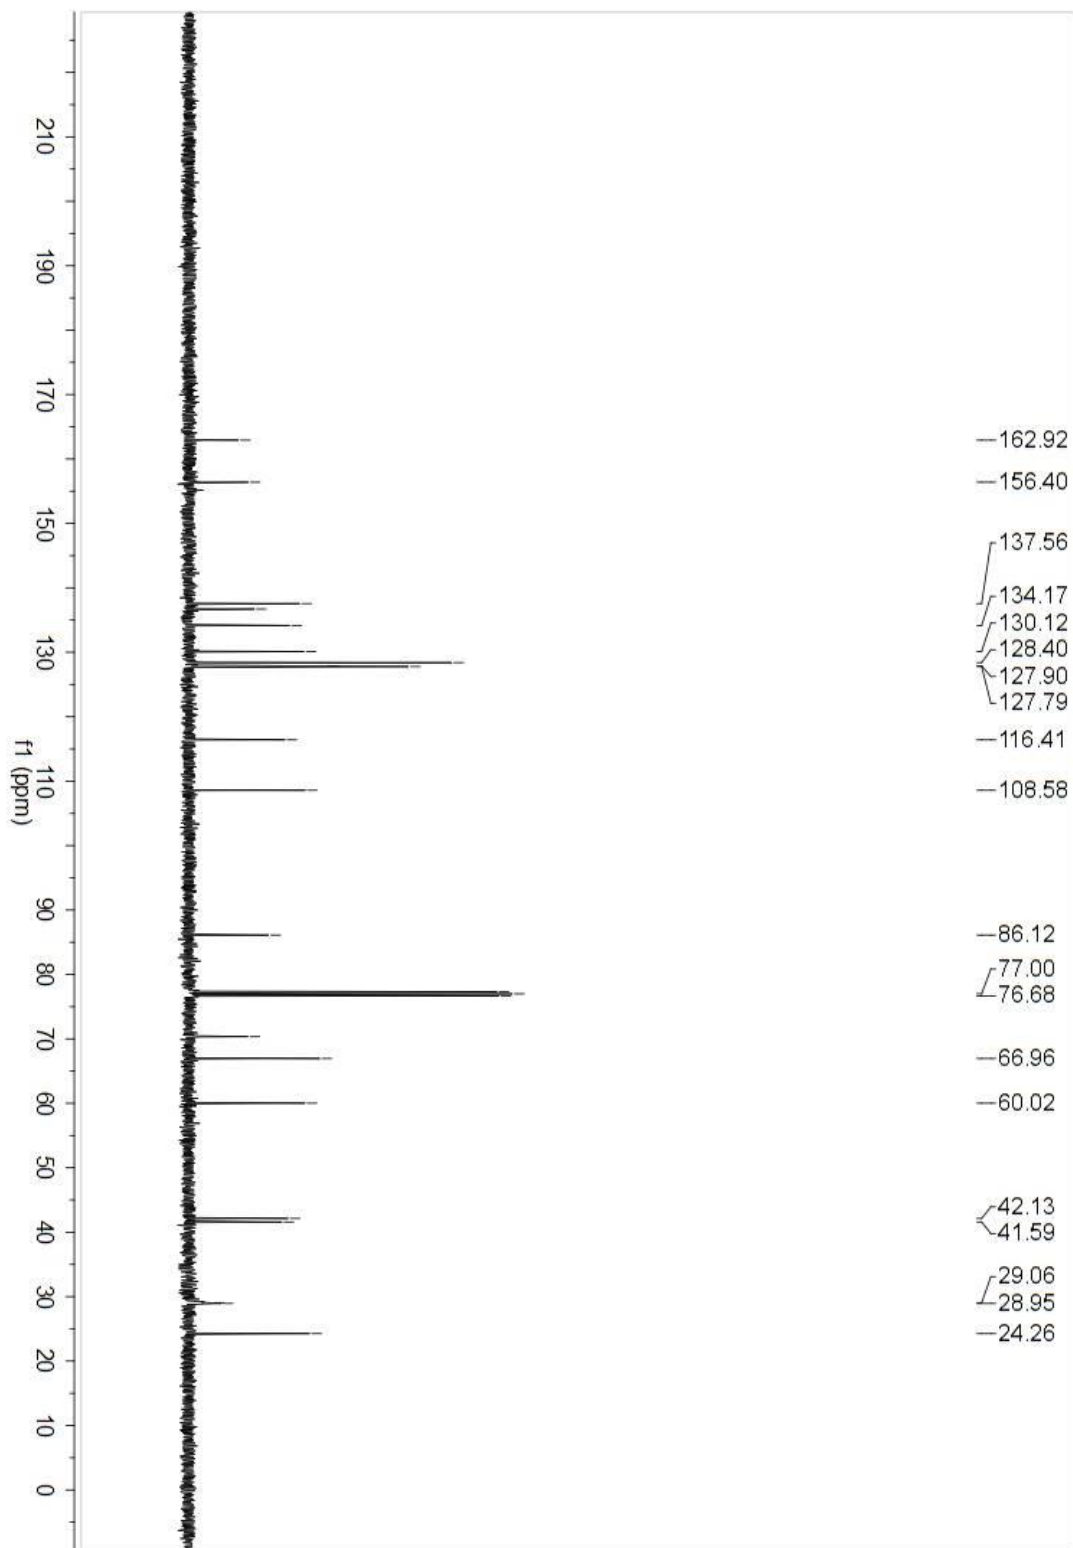

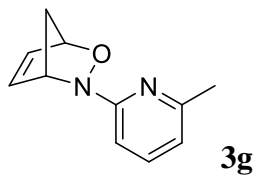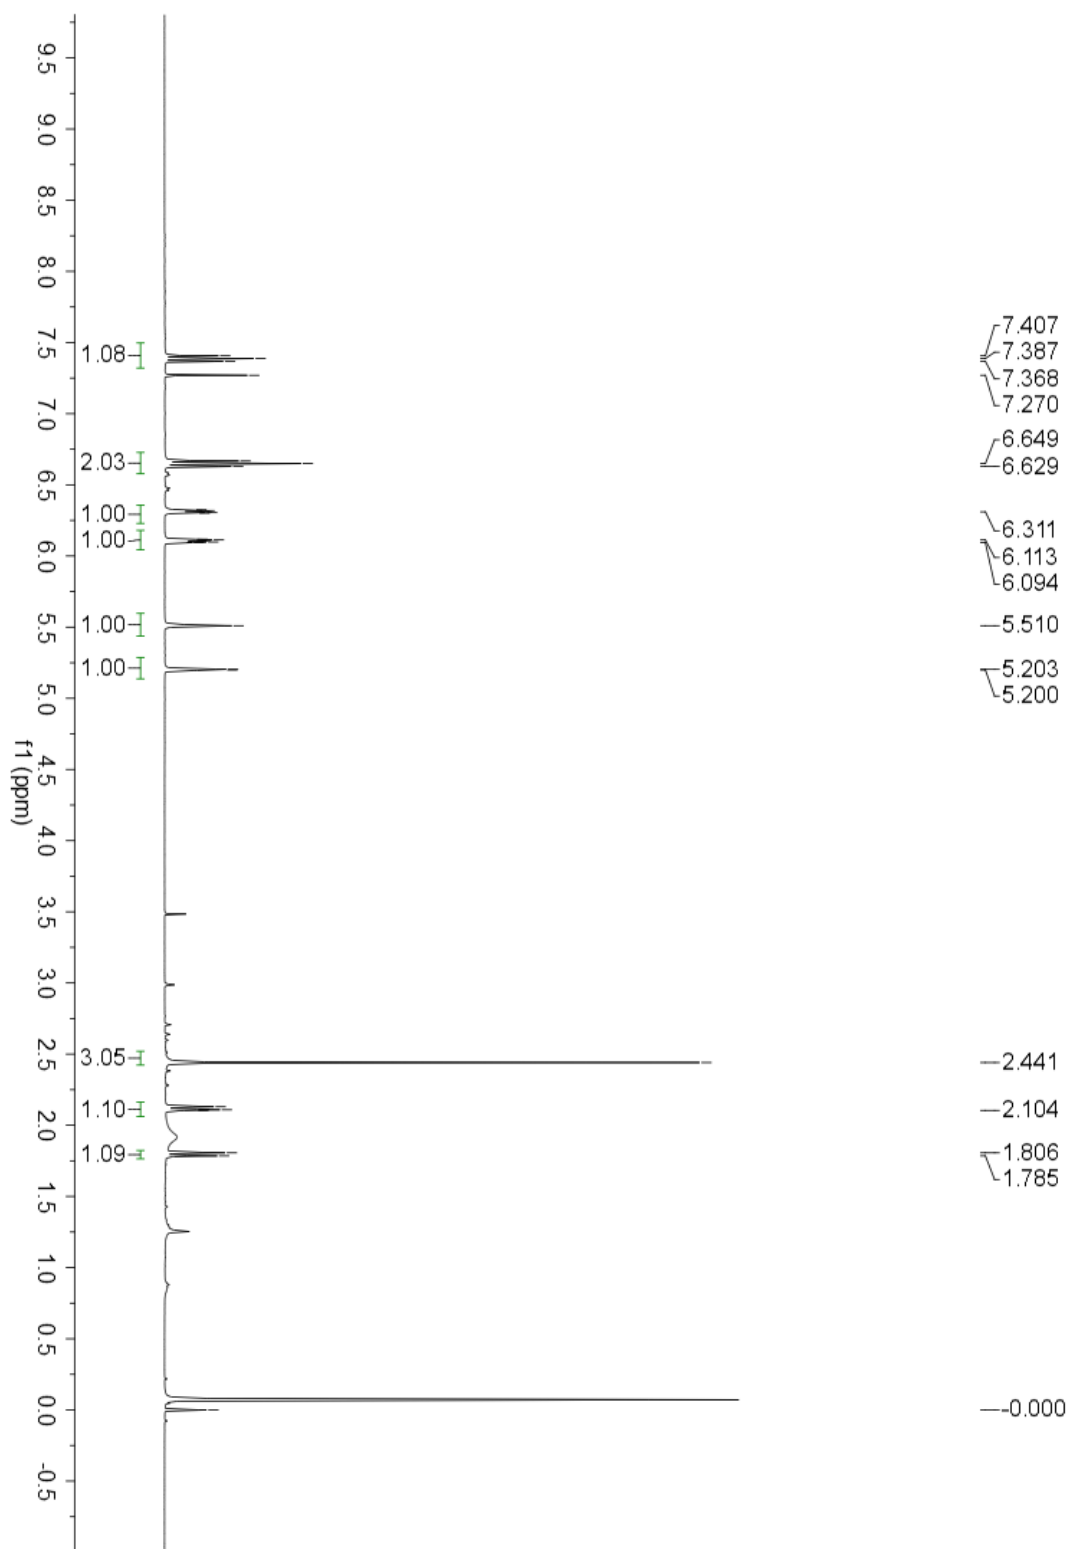

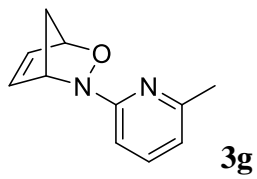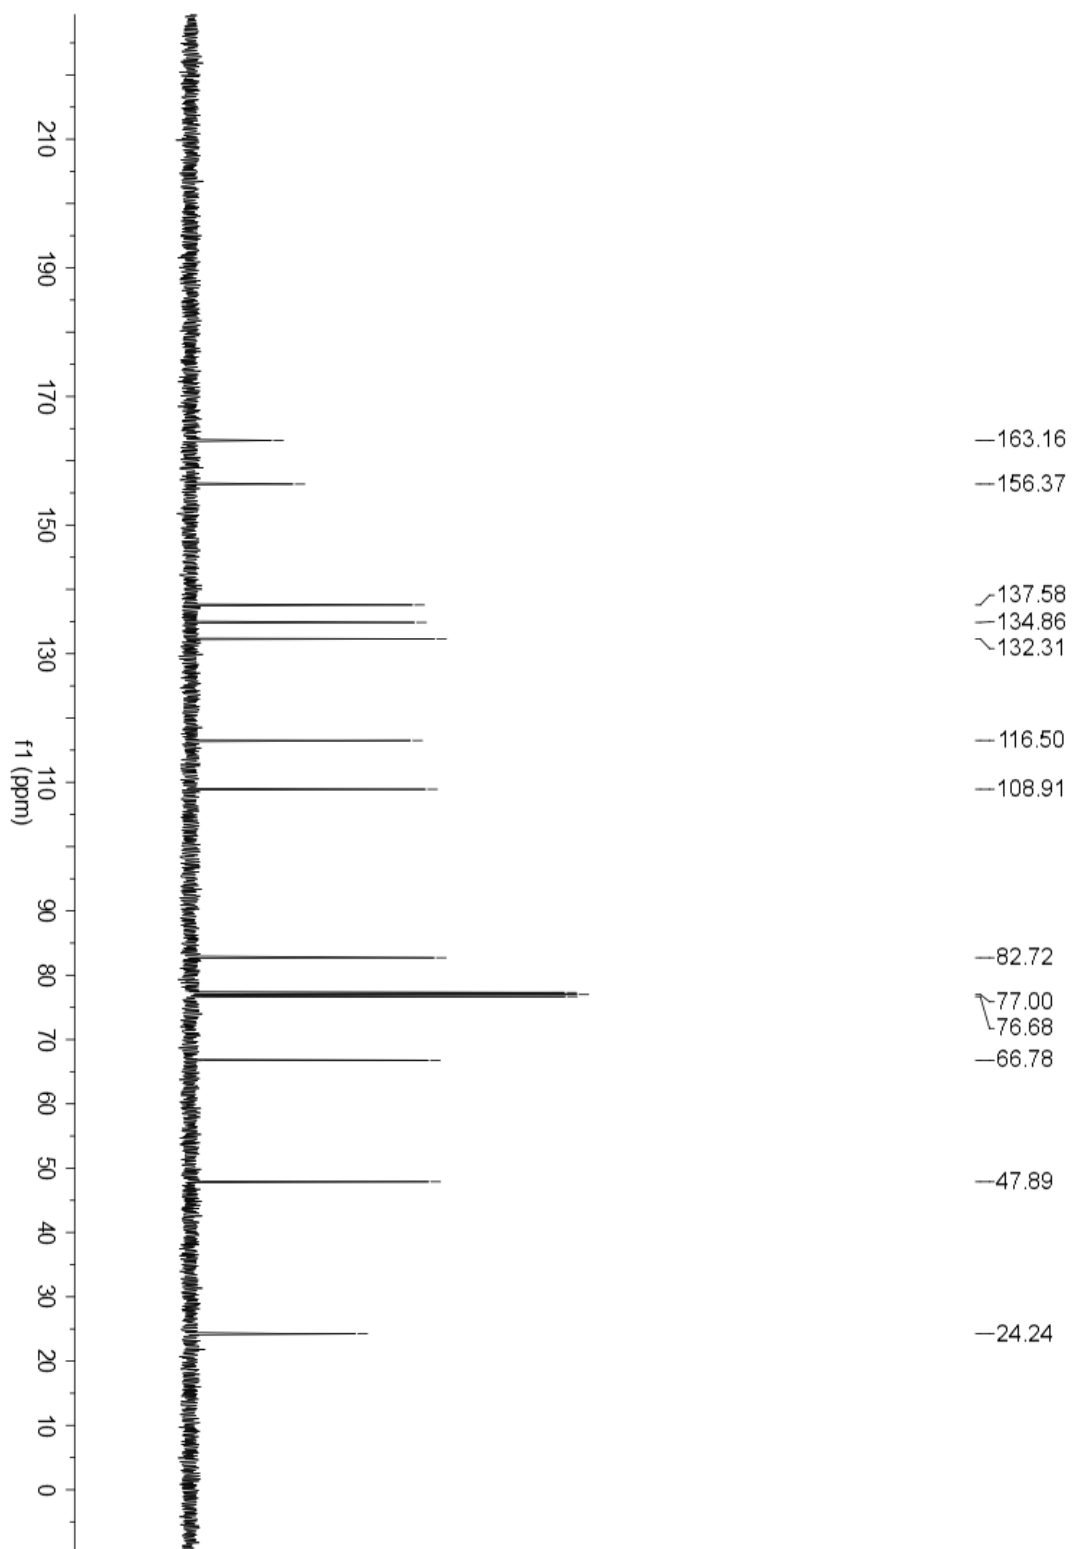

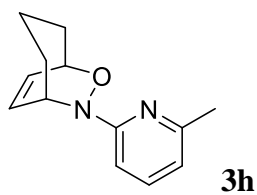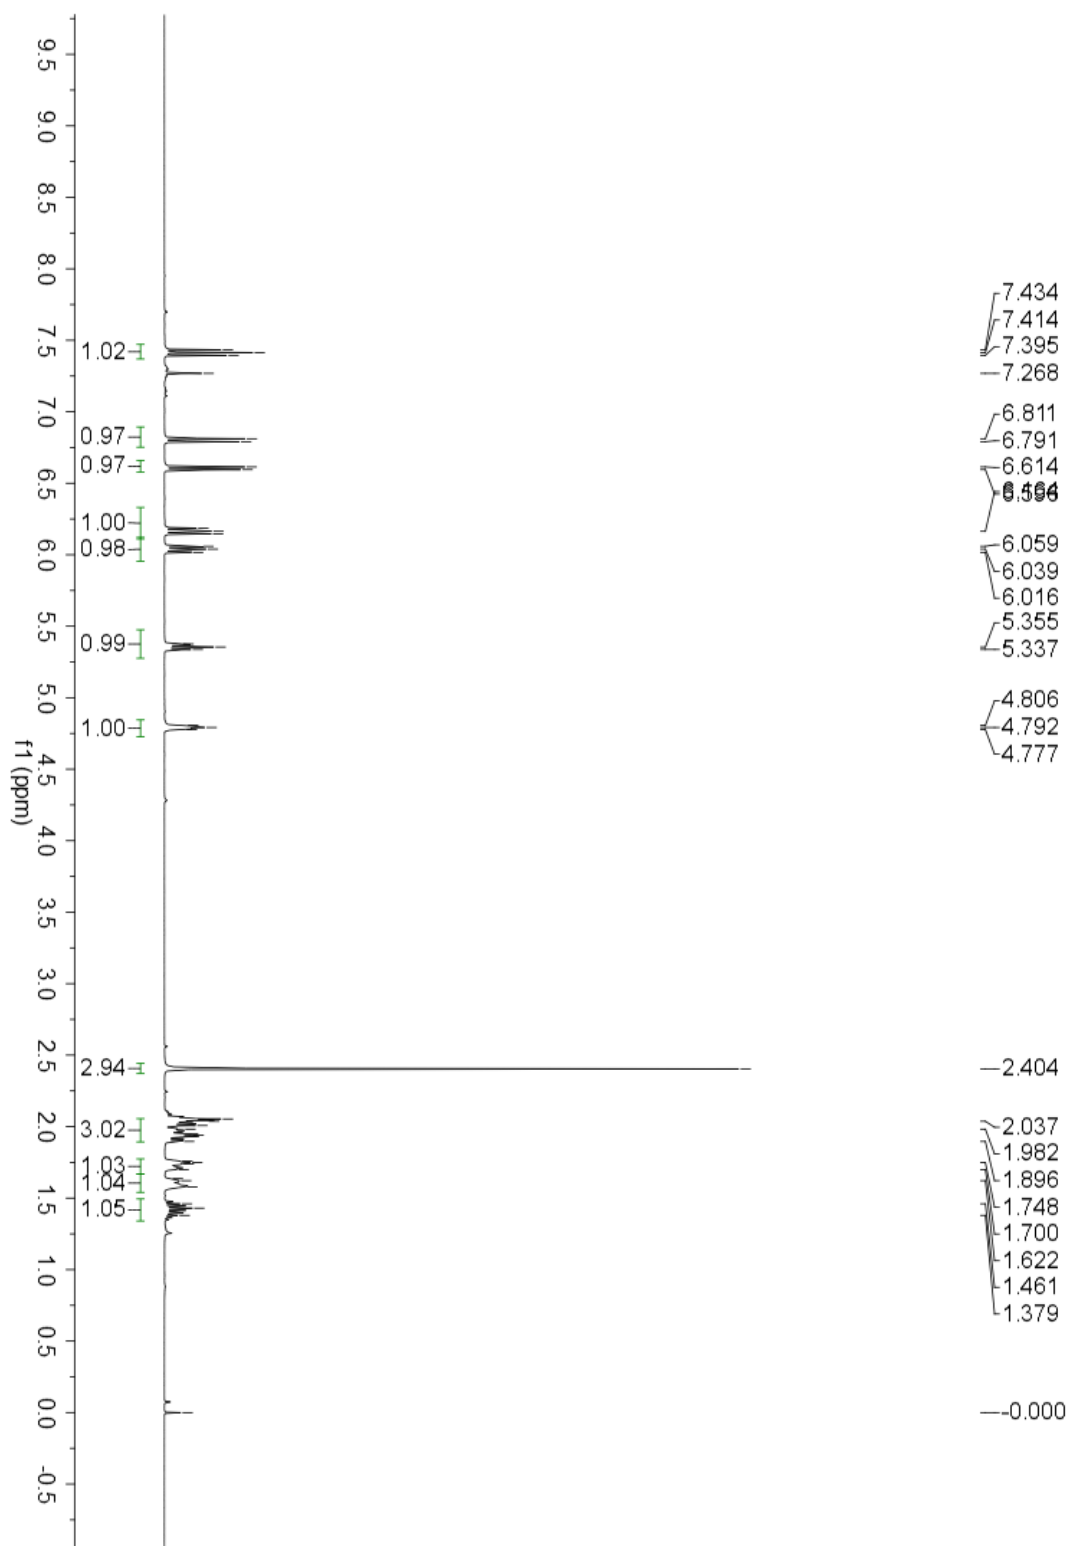

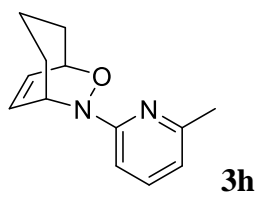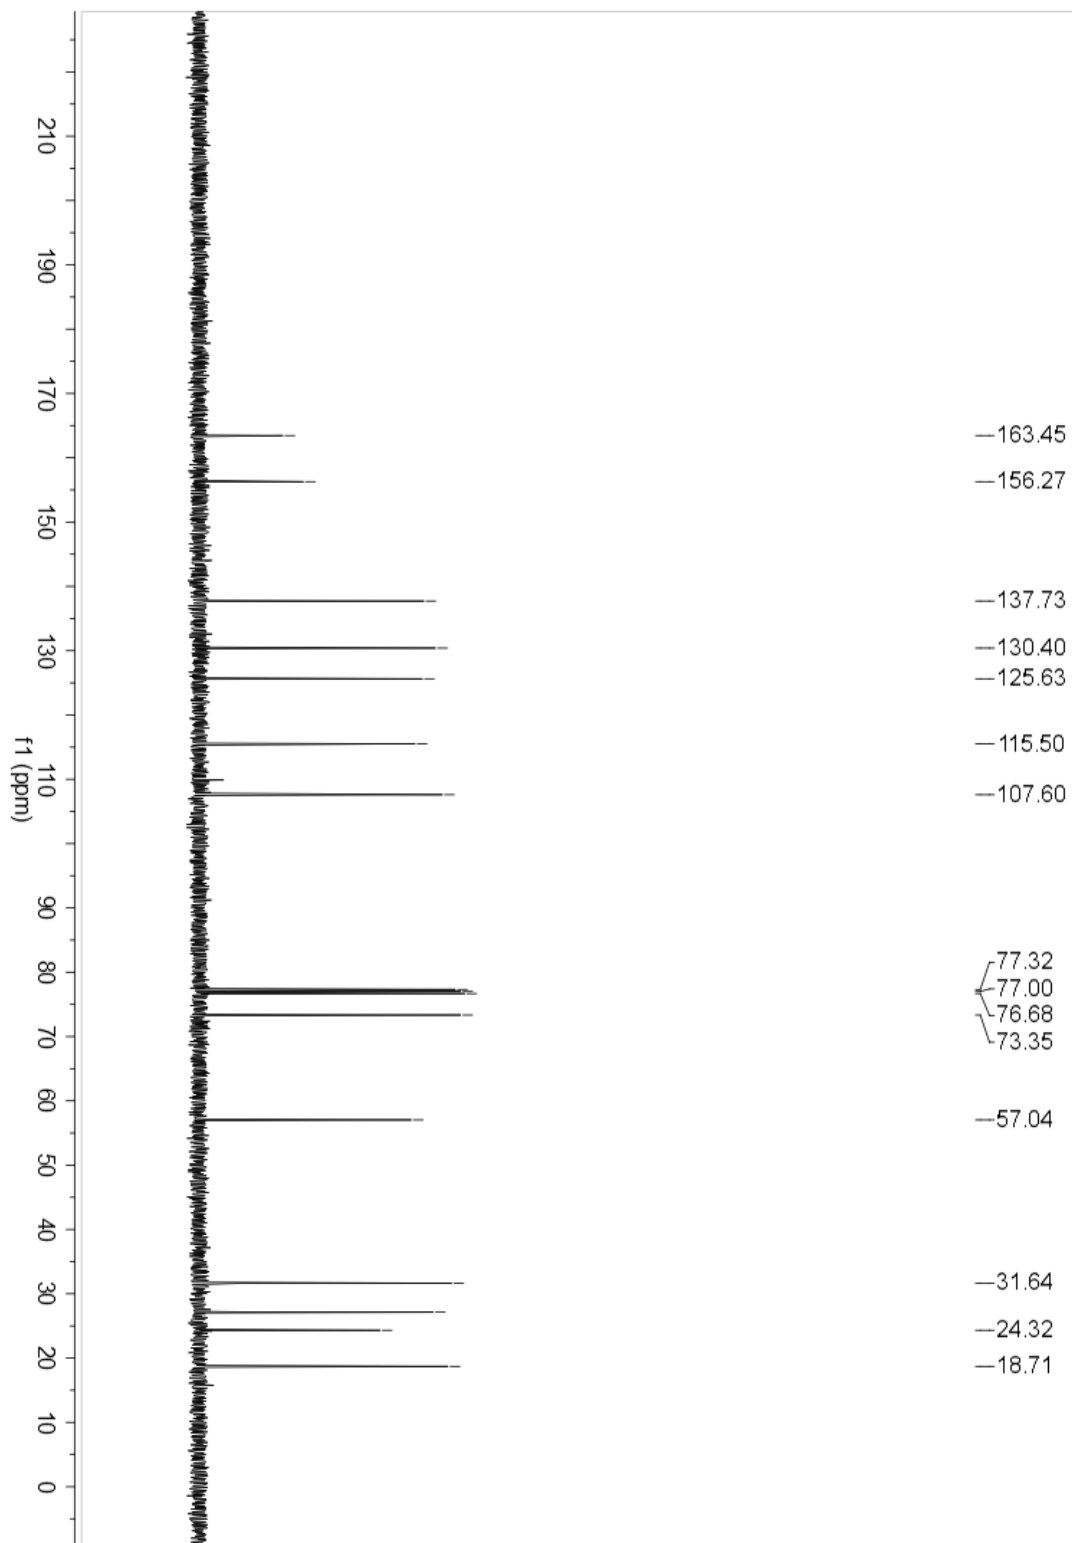



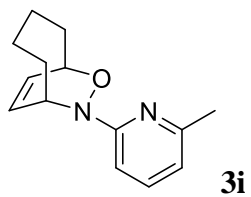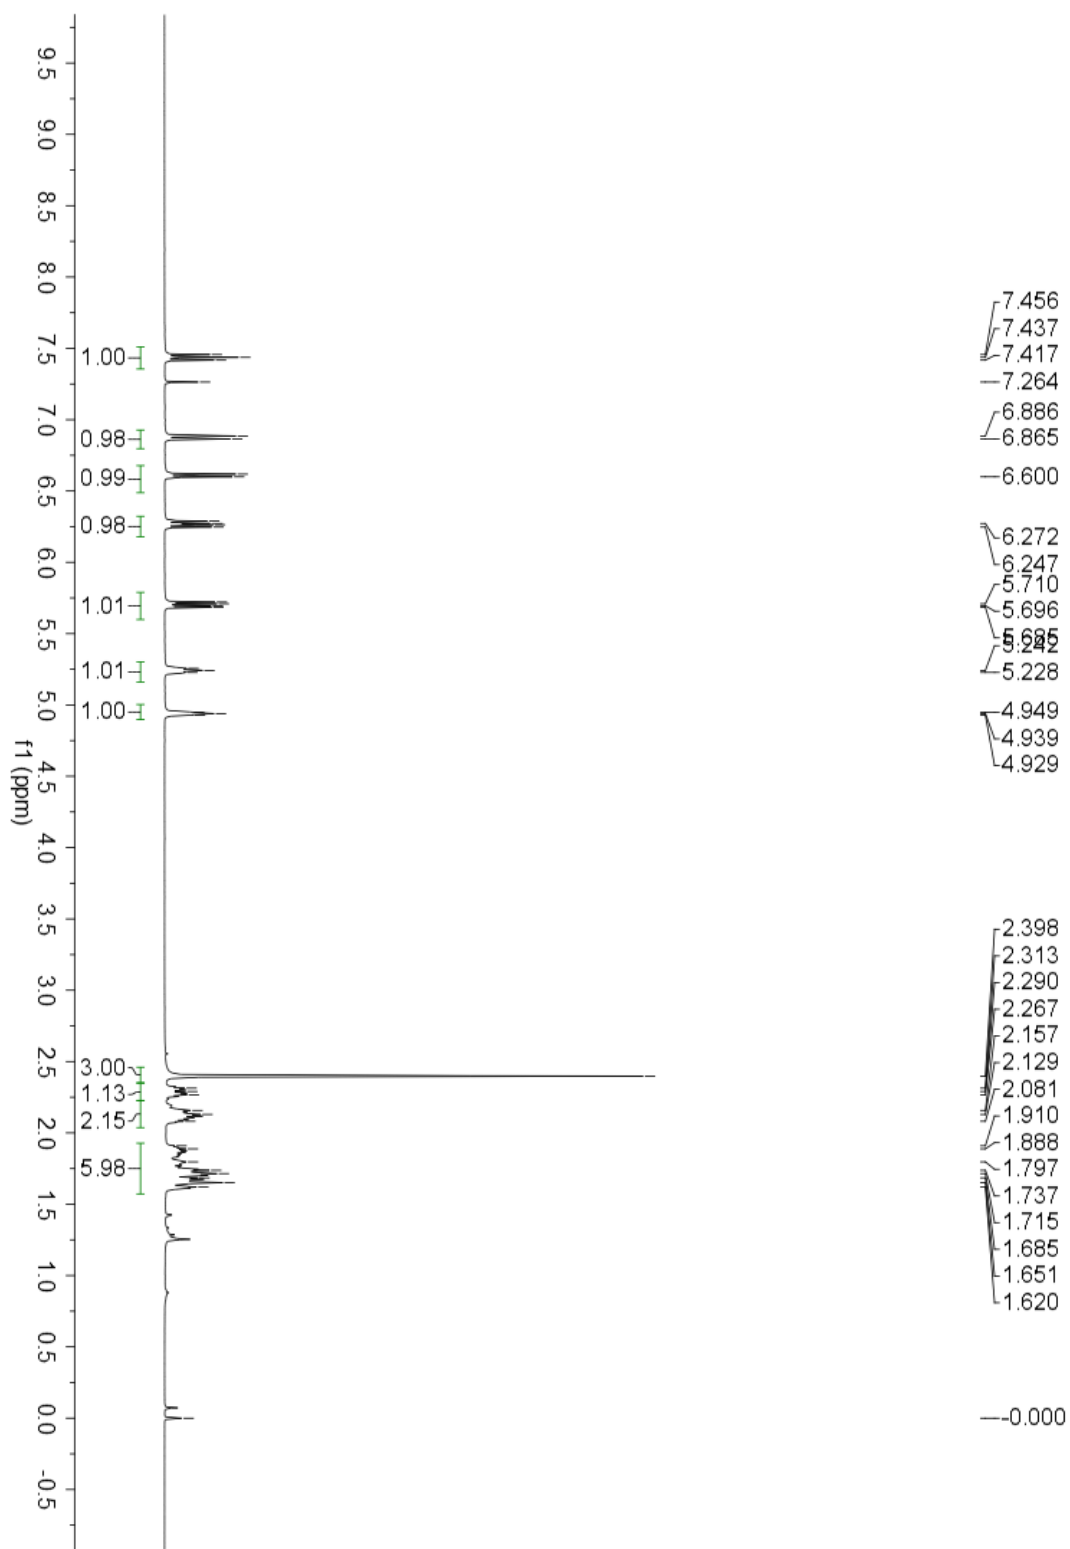

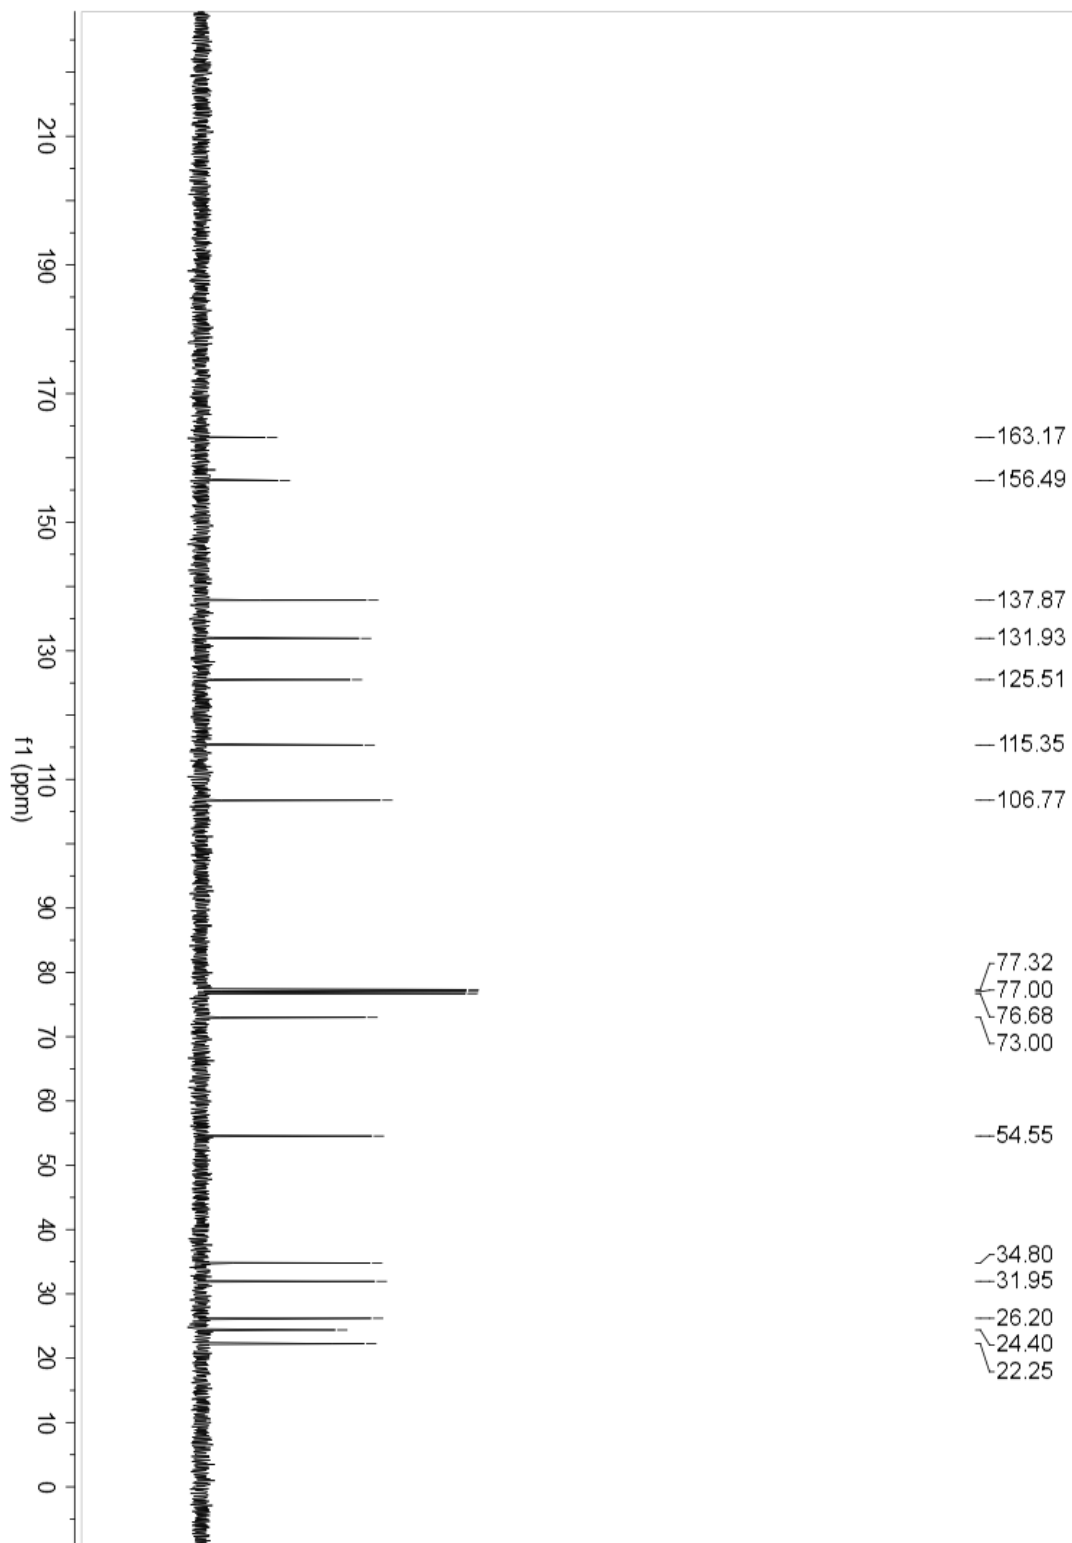

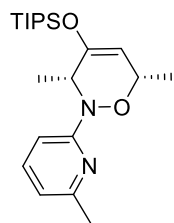

**3j**

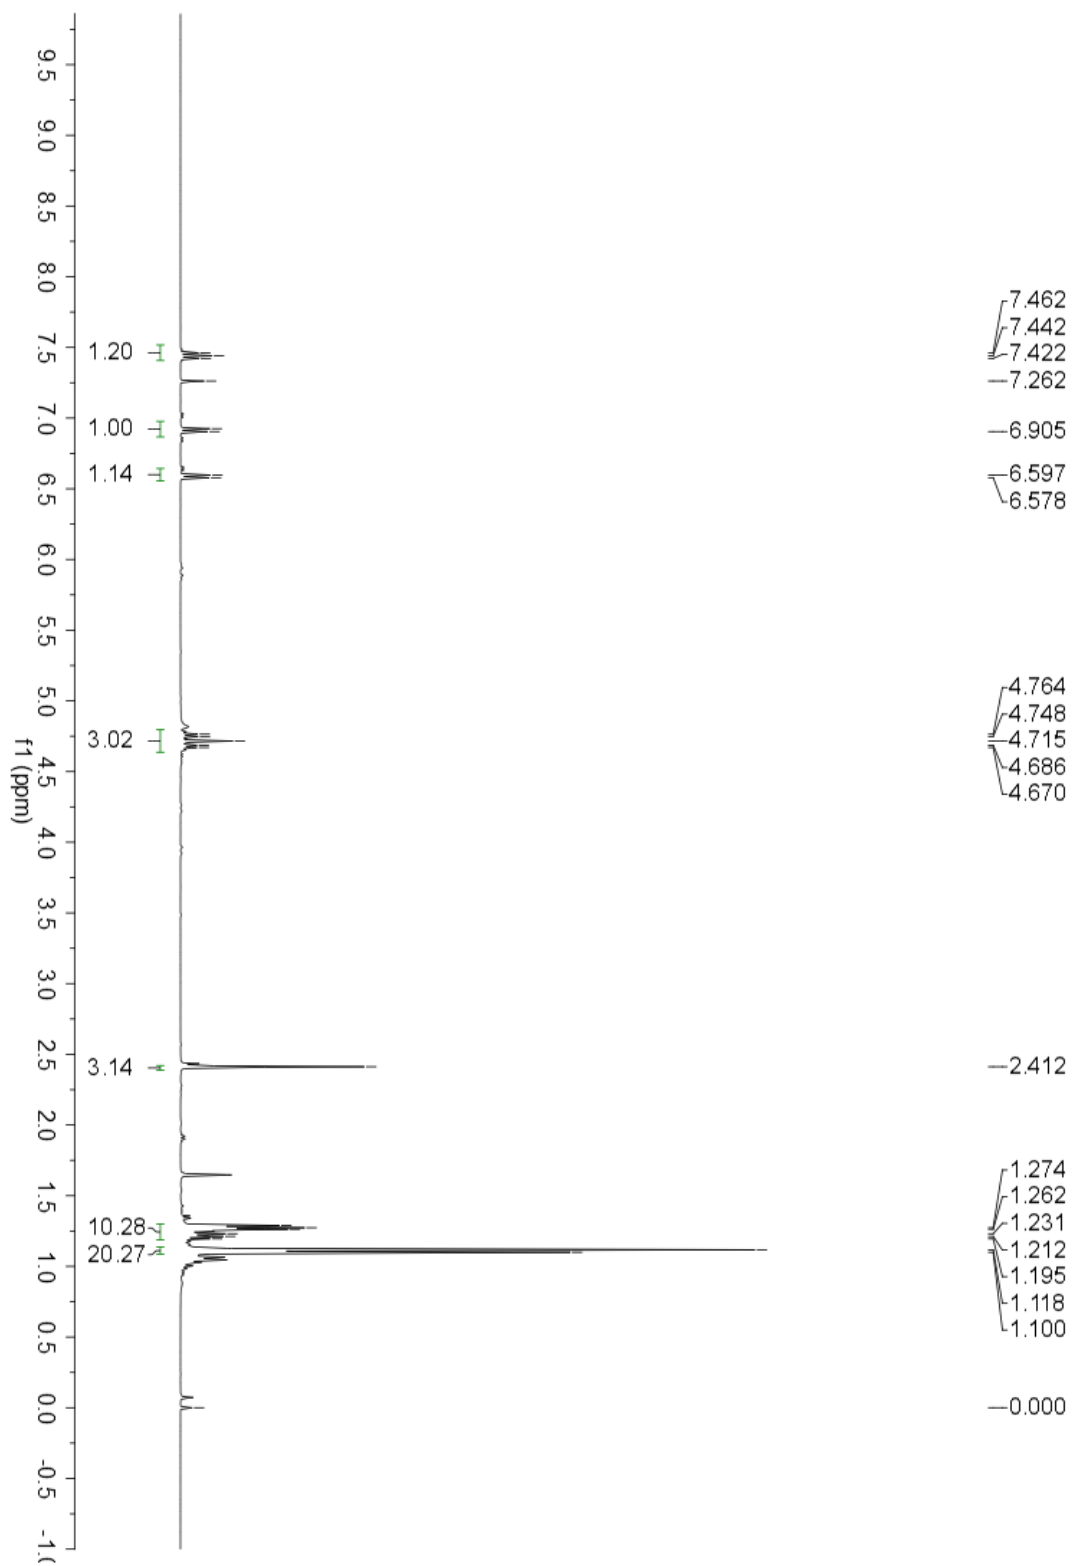

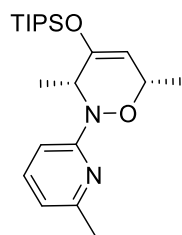

**3j**

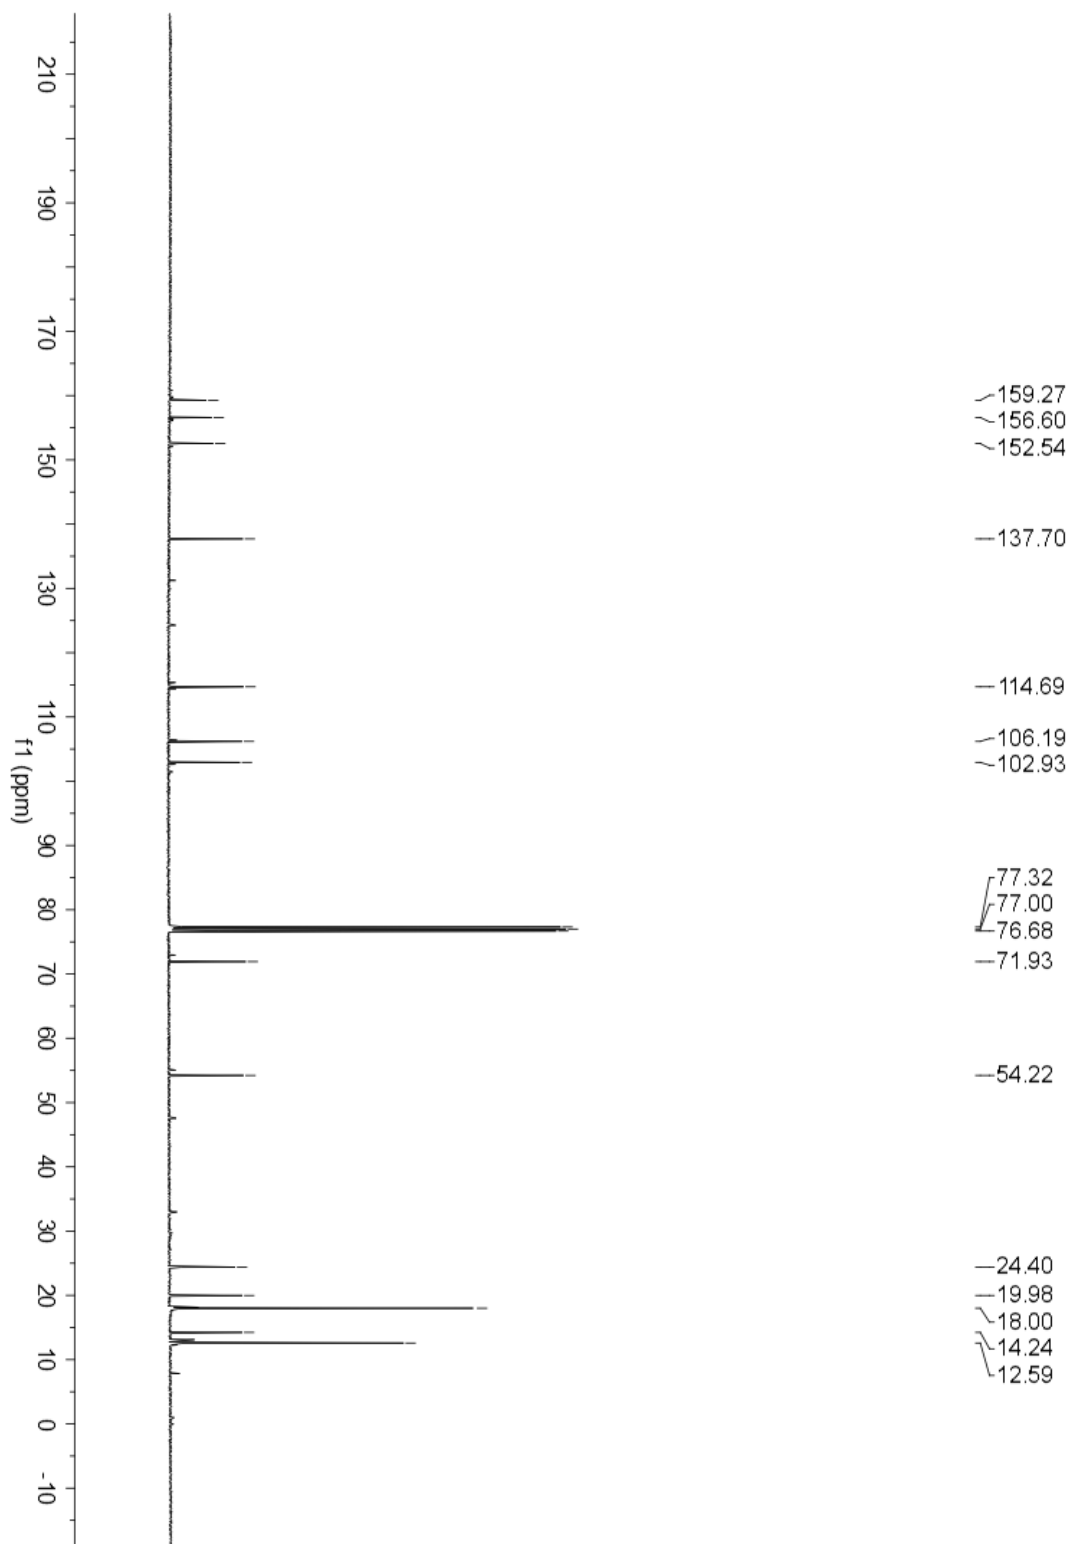

## V. HPLC Chromatograms

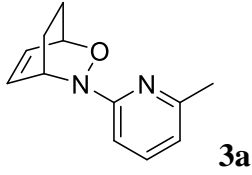

Data File D:\LC\DATA\LJ\LJ-10-22\LJ-10-22 2015-12-25 21-30-39\054-0201.D  
 Sample Name: LJ-10-22

```

=====
Acq. Operator   : LHC                      Seq. Line :    2
Acq. Instrument : Instrument 1              Location  : Vial 54
Injection Date  : 12/25/2015 9:43:08 PM    Inj       :    1
                                           Inj Volume: 5 µl
Acq. Method     : D:\LC\DATA\LJ\LJ-10-22\LJ-10-22 2015-12-25 21-30-39\0DH-5-95-1ML-254NM-
                20MIN.M
Last changed    : 12/16/2015 3:05:20 PM by LHC
Analysis Method : D:\LC\DATA\LJ\LJ-10-22\LJ-10-22 2015-12-25 21-30-39\054-0201.D\DA.M (0DH-
                5-95-1ML-254NM-20MIN.M)
Last changed    : 6/30/2016 4:00:23 PM by LHC
                (modified after loading)
=====
  
```

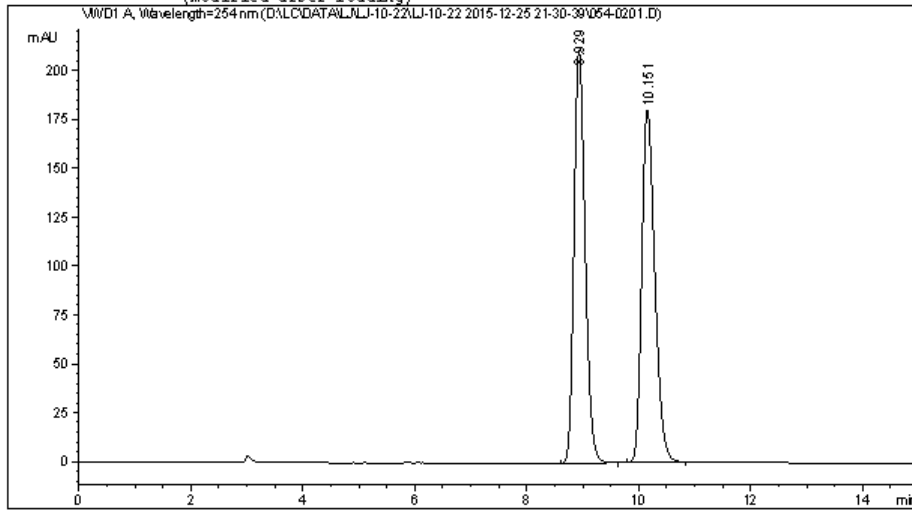

### Area Percent Report

```

=====
Sorted By      :      Signal
Multiplier     :      1.0000
Dilution       :      1.0000
Use Multiplier & Dilution Factor with ISTDs
  
```

Signal 1: VWD1 A, Wavelength=254 nm

| Peak # | RetTime [min] | Type | Width [min] | Area mAU   | Height [mAU] | Area %  |
|--------|---------------|------|-------------|------------|--------------|---------|
| 1      | 8.929         | BB   | 0.2122      | 2921.22168 | 211.40381    | 50.0379 |
| 2      | 10.151        | BB   | 0.2499      | 2916.79443 | 180.24718    | 49.9621 |

Totals : 5838.01611 391.65099

Instrument 1 6/30/2016 4:00:32 PM LHC

Page 1 of 1

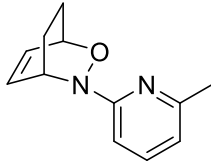

**3a**

Data File D:\LC\DATA\LJ\LJ-10-31\LJ-10-31 2015-12-31 16-11-01\049-0201.D  
 Sample Name: C

```

=====
Acq. Operator   : LHC                      Seq. Line :    2
Acq. Instrument : Instrument 1              Location  : Vial 49
Injection Date  : 12/31/2015 4:23:50 PM    Inj       :    1
                                           Inj Volume: 5 µl
Acq. Method    : D:\LC\DATA\LJ\LJ-10-31\LJ-10-31 2015-12-31 16-11-01\0DH-5-95-1ML-254NM-
                20MIN.M
Last changed   : 12/16/2015 3:05:20 PM by LHC
Analysis Method : D:\LC\DATA\LJ\LJ-10-31\LJ-10-31 2015-12-31 16-11-01\049-0201.D\DA.M (0DH-
                5-95-1ML-254NM-20MIN.M)
Last changed   : 6/30/2016 4:03:30 PM by LHC
                (modified after loading)
=====
  
```

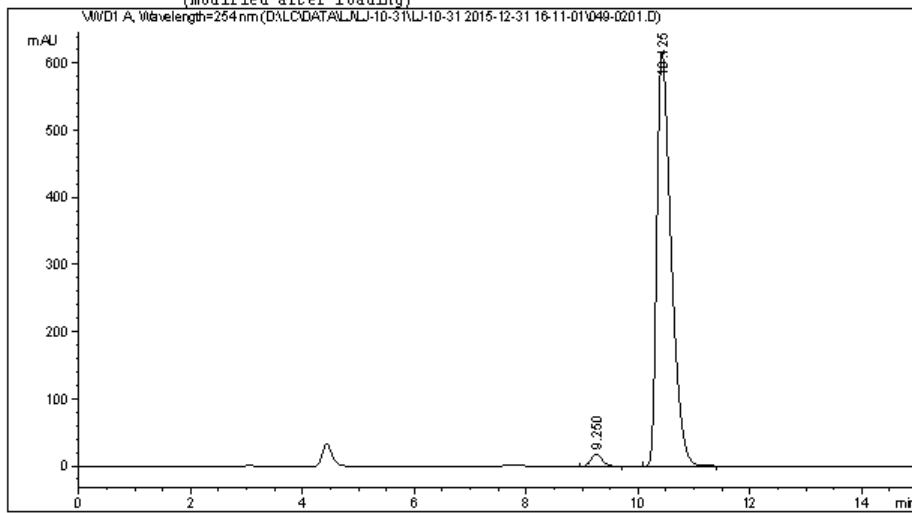

=====  
 Area Percent Report  
 =====

```

Sorted By      :      Signal
Multiplier     :      1.0000
Dilution       :      1.0000
Use Multiplier & Dilution Factor with ISTDs
  
```

Signal 1: VWD1 A, Wavelength=254 nm

| Peak # | RetTime [min] | Type | Width [min] | Area mAU  | Height [mAU] | Area %  |
|--------|---------------|------|-------------|-----------|--------------|---------|
| 1      | 9.250         | BB   | 0.2185      | 249.83473 | 17.70325     | 2.2288  |
| 2      | 10.425        | BB   | 0.2717      | 1.09598e4 | 615.91583    | 97.7712 |

Totals :                    1.12096e4   633.61908

Instrument 1 6/30/2016 4:03:36 PM LHC

Page 1 of 1

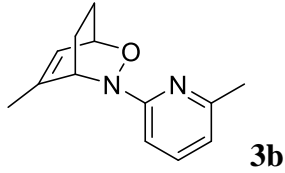

Data File D:\LC\DATA\LJ\LJ-10-43\LJ-10-43 2016-01-09 10-53-20\061-0101.D  
 Sample Name: c

```

=====
Acq. Operator   : LHC                      Seq. Line :    1
Acq. Instrument : Instrument 1              Location  : Vial 61
Injection Date  : 1/9/2016 10:54:45 AM     Inj       :    1
                                           Inj Volume: 5 µl

Acq. Method     : D:\LC\DATA\LJ\LJ-10-43\LJ-10-43 2016-01-09 10-53-20\ODH-5-95-1ML-254NM-
20MIN.M
Last changed    : 1/9/2016 10:53:45 AM by LHC
                 (modified after loading)
Analysis Method : D:\LC\DATA\LJ\LJ-10-43\LJ-10-43 2016-01-09 10-53-20\061-0101.D\DA.M (ODH-
5-95-1ML-254NM-20MIN.M)
Last changed    : 6/30/2016 7:28:00 PM by LHC
                 (modified after loading)
=====
  
```

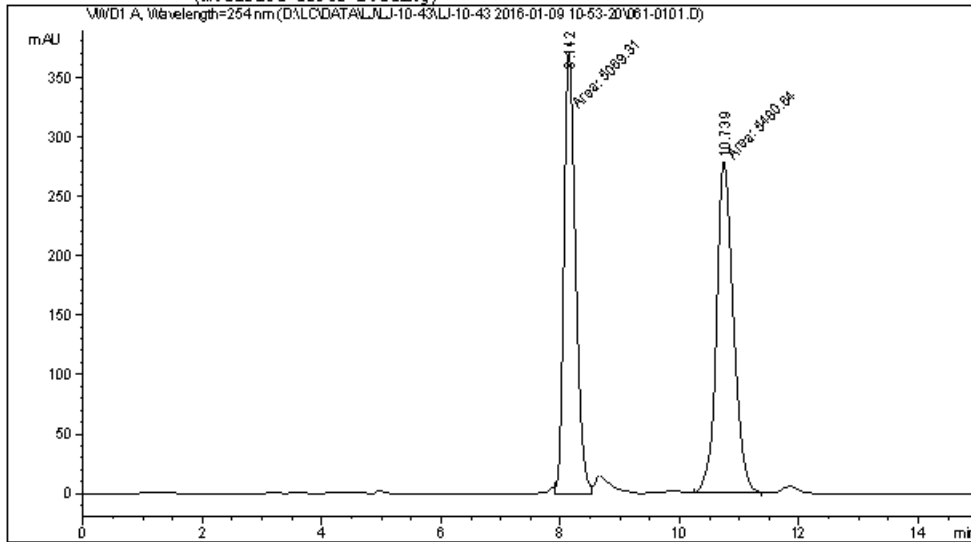

=====  
 Area Percent Report  
 =====

```

Sorted By      :      Signal
Multiplier     :      1.0000
Dilution       :      1.0000
Use Multiplier & Dilution Factor with ISTDs
  
```

Signal 1: VMD1 A, Wavelength=254 nm

| Peak # | RetTime [min] | Type | Width [min] | Area mAU   | Area %  | Height [mAU] | Area %  |
|--------|---------------|------|-------------|------------|---------|--------------|---------|
| 1      | 8.142         | MF   | 0.2275      | 5069.31201 | 48.0506 | 371.41397    | 48.0506 |
| 2      | 10.739        | MM   | 0.3286      | 5480.64209 | 51.9494 | 277.96939    | 51.9494 |

Totals :                                    1.05500e4    649.38336

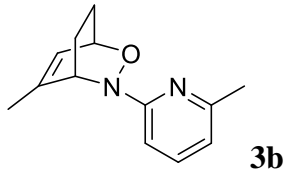

Data File D:\LC\DATA\LJ\LJ-10-43\LJ-10-43 2016-01-09 10-53-20\063-0301.D  
 Sample Name: b

```

=====
Acq. Operator   : LHC                      Seq. Line :    3
Acq. Instrument : Instrument 1              Location  : Vial 63
Injection Date  : 1/9/2016 11:27:55 AM     Inj       :    1
                                           Inj Volume: 5 µl

Acq. Method     : D:\LC\DATA\LJ\LJ-10-43\LJ-10-43 2016-01-09 10-53-20\ODH-5-95-1ML-254NM-
20MIN.M
Last changed    : 1/9/2016 11:26:27 AM by LHC
                  (modified after loading)
Analysis Method : D:\LC\DATA\LJ\LJ-10-43\LJ-10-43 2016-01-09 10-53-20\063-0301.D\DA.M (ODH-
5-95-1ML-254NM-20MIN.M)
Last changed    : 6/30/2016 7:24:53 PM by LHC
                  (modified after loading)
=====
  
```

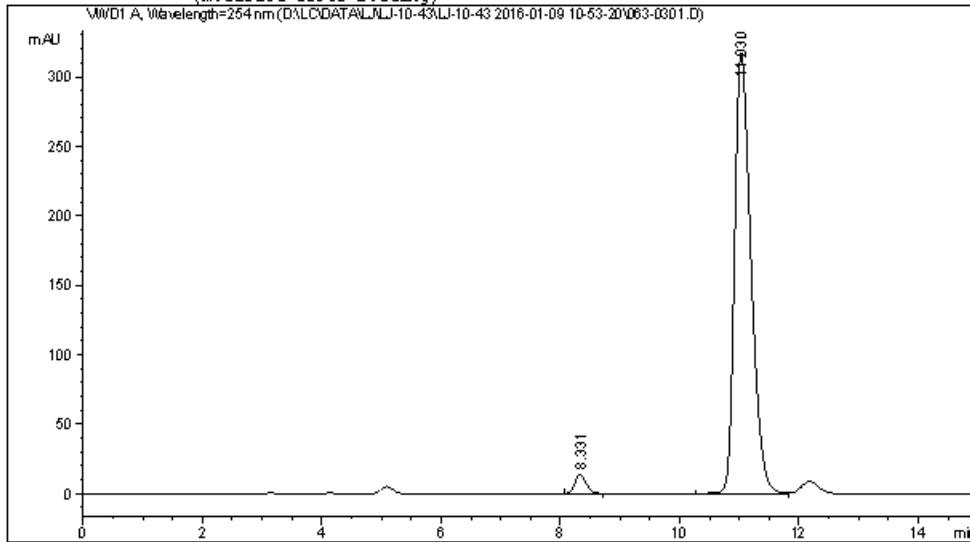

=====  
 Area Percent Report  
 =====

```

Sorted By      :      Signal
Multiplier     :      1.0000
Dilution       :      1.0000
Use Multiplier & Dilution Factor with ISTDs
  
```

Signal 1: VMD1 A, Wavelength=254 nm

| Peak # | RetTime [min] | Type | Width [min] | Area mAU   | Area %  | Height [mAU] | Area %  |
|--------|---------------|------|-------------|------------|---------|--------------|---------|
| 1      | 8.331         | VB   | 0.2047      | 181.26678  | 2.8957  | 13.75265     | 2.8957  |
| 2      | 11.030        | W    | 0.2947      | 6078.59863 | 97.1043 | 317.44678    | 97.1043 |

Totals :                                    6259.86542    331.19943



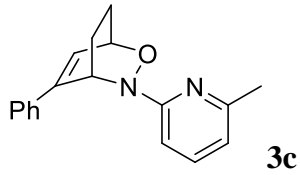

Data File D:\LC\DATA\LJ\LJ-10-46\LJ-10-51 2006-01-01 05-03-48\009-0101.D  
 Sample Name: LJ-10-51A

```

=====
Acq. Operator   : LHC                      Seq. Line :    1
Acq. Instrument : Instrument 1              Location  : Vial 9
Injection Date  : 1/1/2006 5:05:26 AM      Inj       :    1
                                           Inj Volume: 5 µl
Acq. Method     : D:\LC\DATA\LJ\LJ-10-46\LJ-10-51 2006-01-01 05-03-48\0DH-5-95-1ML-254NM-30MIN.M
Last changed    : 1/1/2006 5:03:25 AM by LHC
Analysis Method : D:\LC\DATA\LJ\LJ-10-46\LJ-10-51 2006-01-01 05-03-48\009-0101.D\A.M (0DH-5-95-1ML-254NM-30MIN.M)
Last changed    : 10/5/2016 7:22:10 PM by LHC
                 (modified after loading)
=====
  
```

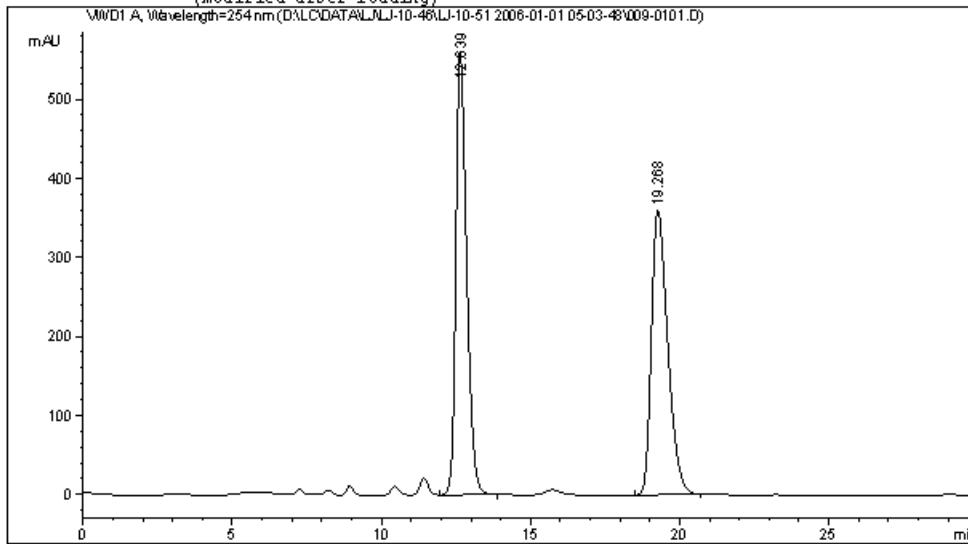

=====  
 Area Percent Report  
 =====

```

Sorted By      :      Signal
Multiplier     :      1.0000
Dilution       :      1.0000
Use Multiplier & Dilution Factor with ISTDs
  
```

Signal 1: VWD1 A, Wavelength=254 nm

| Peak #   | RetTime [min] | Type | Width [min] | Area mAU *s | Height [mAU] | Area %  |
|----------|---------------|------|-------------|-------------|--------------|---------|
| 1        | 12.639        | BB   | 0.3856      | 1.40430e4   | 557.47107    | 50.6786 |
| 2        | 19.268        | BB   | 0.5787      | 1.36669e4   | 359.65460    | 49.3214 |
| Totals : |               |      |             | 2.77099e4   | 917.12567    |         |

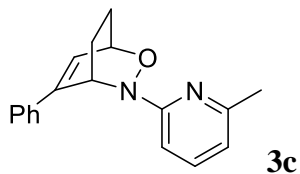

Data File D:\LC\DATA\LJ\LJ-10-46\LJ-10-51 2006-01-01 05-03-48\010-0201.D  
 Sample Name: LJ-10-51B

```

=====
Acq. Operator   : LHC                      Seq. Line :    2
Acq. Instrument : Instrument 1              Location  : Vial 10
Injection Date  : 1/1/2006 5:37:03 AM      Inj       :    1
                                           Inj Volume: 5 µl

Acq. Method     : D:\LC\DATA\LJ\LJ-10-46\LJ-10-51 2006-01-01 05-03-48\0DH-5-95-1ML-254NM-
30MIN.M
Last changed    : 1/1/2006 5:03:25 AM by LHC
Analysis Method : D:\LC\DATA\LJ\LJ-10-46\LJ-10-51 2006-01-01 05-03-48\010-0201.D\A.M (0DH-
5-95-1ML-254NM-30MIN.M)
Last changed    : 6/30/2016 4:14:29 PM by LHC
(modified after loading)
=====
  
```

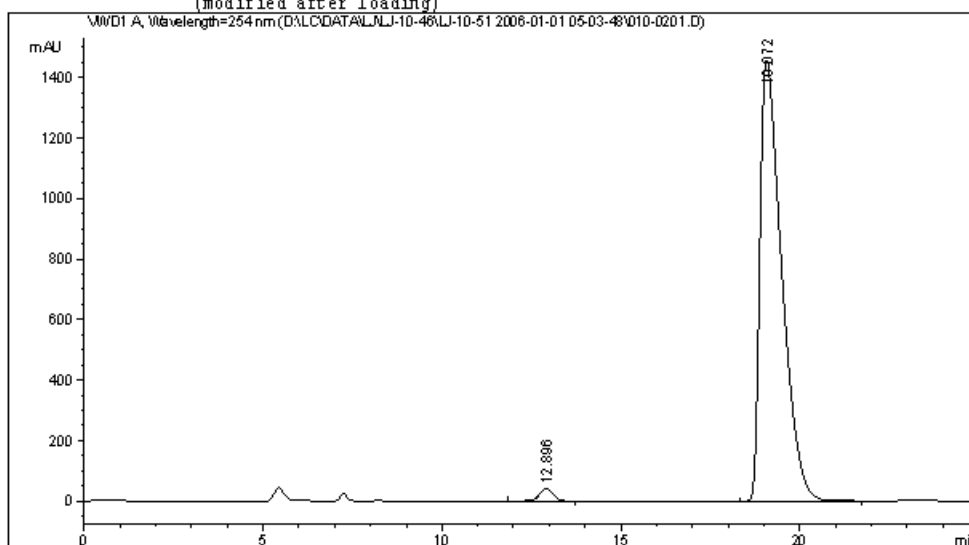

=====  
 Area Percent Report  
 =====

```

Sorted By      :      Signal
Multiplier     :      1.0000
Dilution       :      1.0000
Use Multiplier & Dilution Factor with ISTDs
  
```

Signal 1: VWD1 A, Wavelength=254 nm

| Peak # | RetTime [min] | Type | Width [min] | Area mAU   | Area %  | Height [mAU] |
|--------|---------------|------|-------------|------------|---------|--------------|
| 1      | 12.896        | VB   | 0.4134      | 1134.27441 | 1.8155  | 41.70160     |
| 2      | 19.072        | BB   | 0.6314      | 6.13435e4  | 98.1845 | 1455.66687   |

Totals :                    6.24777e4  1497.36847

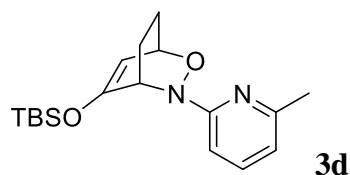

Data File D:\LC\DATA\LJ\LJ-10-67\XYZY-BINAP 2016-07-05 11-12-31\092-0201.D  
 Sample Name: lj-10-67-1

```

=====
Acq. Operator   : LHC                               Seq. Line :    2
Acq. Instrument : Instrument 1                       Location  : Vial 92
Injection Date  : 7/5/2016 11:25:06 AM              Inj       :    1
                                                    Inj Volume: 5 µl

Acq. Method     : D:\LC\DATA\LJ\LJ-10-67\XYZY-BINAP 2016-07-05 11-12-31\ODH-5-95-1ML-254NM-
20MIN.M
Last changed    : 12/16/2015 3:05:20 PM by LHC
Analysis Method : D:\LC\DATA\LJ\LJ-10-67\XYZY-BINAP 2016-07-05 11-12-31\092-0201.D\DA.M (ODH-
5-95-1ML-254NM-20MIN.M)
Last changed    : 7/6/2016 10:32:56 AM by LHC
(modified after loading)
  
```

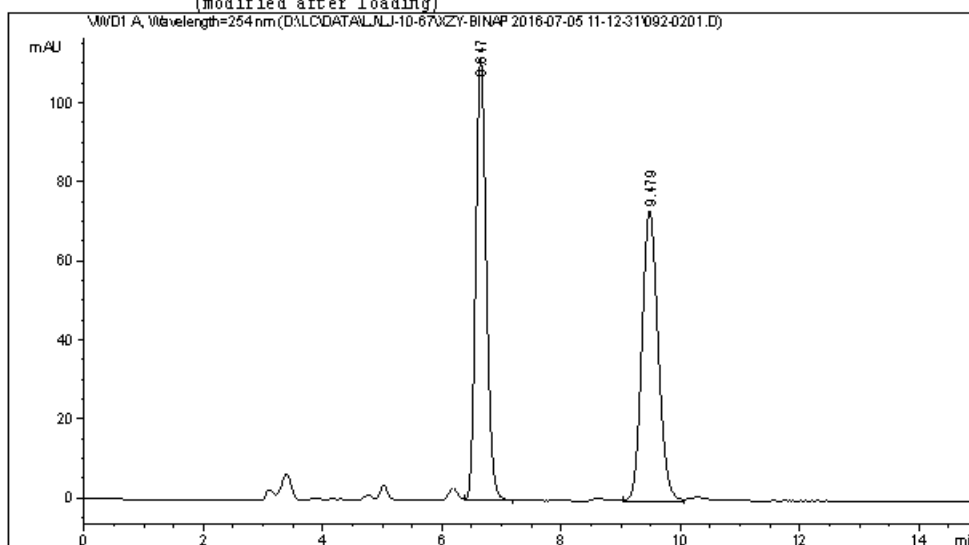

Area Percent Report

```

Sorted By      : Signal
Multiplier     : 1.0000
Dilution       : 1.0000
Use Multiplier & Dilution Factor with ISTDs
  
```

Signal 1: VWD1 A, Wavelength=254 nm

| Peak # | RetTime [min] | Type | Width [min] | Area mAU   | Area %  | Height [mAU] |
|--------|---------------|------|-------------|------------|---------|--------------|
| 1      | 6.647         | VB   | 0.1903      | 1371.15271 | 49.7800 | 111.32205    |
| 2      | 9.479         | BV   | 0.2929      | 1383.27271 | 50.2200 | 73.32944     |

Totals : 2754.42542 184.65150

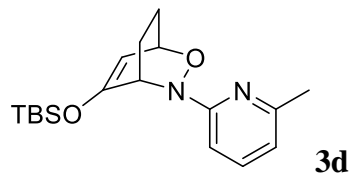

Data File D:\LC\DATA\LJ\LJ-10-67\XYZY-BINAP 2016-07-05 11-12-31\093-0301.D  
 Sample Name: lj-10-67-2

```

=====
Acq. Operator   : LHC                      Seq. Line :    3
Acq. Instrument : Instrument 1             Location  : Vial 93
Injection Date  : 7/5/2016 11:46:28 AM    Inj       :    1
                                           Inj Volume: 5 µl

Acq. Method     : D:\LC\DATA\LJ\LJ-10-67\XYZY-BINAP 2016-07-05 11-12-31\ODH-5-95-1ML-254NM-
20MIN.M
Last changed    : 12/16/2015 3:05:20 PM by LHC
Analysis Method : D:\LC\DATA\LJ\LJ-10-67\XYZY-BINAP 2016-07-05 11-12-31\093-0301.D\DA.M (ODH-
5-95-1ML-254NM-20MIN.M)
Last changed    : 7/6/2016 10:35:08 AM by LHC
                 (modified after loading)
=====
  
```

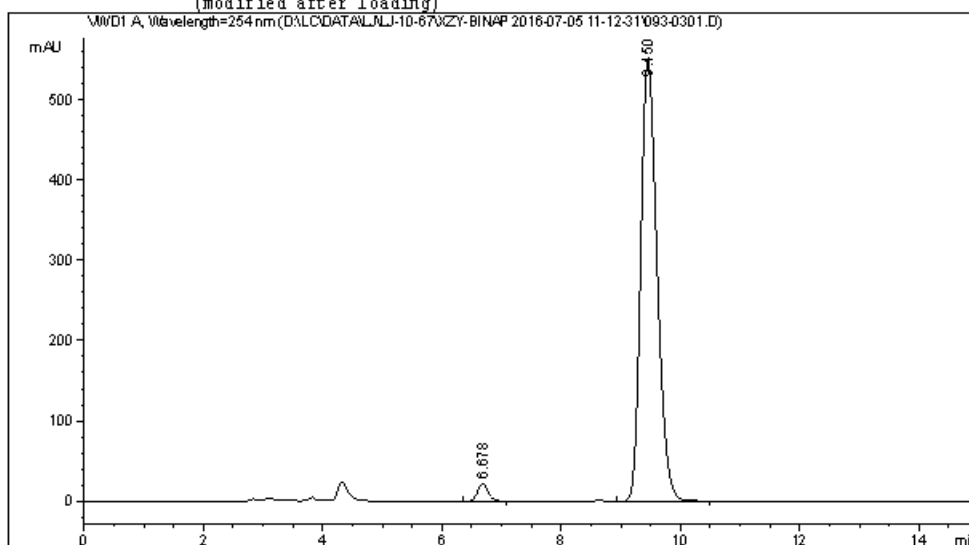

=====  
 Area Percent Report  
 =====

```

Sorted By      :      Signal
Multiplier     :      1.0000
Dilution       :      1.0000
Use Multiplier & Dilution Factor with ISTDs
  
```

Signal 1: VWD1 A, Wavelength=254 nm

| Peak # | RetTime [min] | Type | Width [min] | Area mAU  | Area %  | Height [mAU] |
|--------|---------------|------|-------------|-----------|---------|--------------|
| 1      | 6.678         | VB   | 0.1906      | 269.37753 | 2.5131  | 21.81923     |
| 2      | 9.450         | VB   | 0.2934      | 1.04495e4 | 97.4869 | 548.95526    |

Totals :                    1.07189e4   570.77449

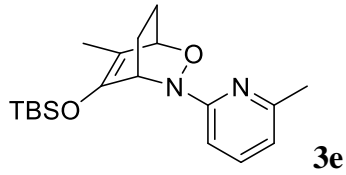

Data File D:\LC\DATA\LJ\LJ-11-51\LJ-11-51 2016-05-04 16-42-30\012-0201.D  
 Sample Name: LJ-11-51

```

=====
Acq. Operator   : LHC                      Seq. Line :    2
Acq. Instrument : Instrument 1              Location  : Vial 12
Injection Date  : 5/4/2016 4:54:55 PM      Inj       :    1
                                           Inj Volume: 5 µl

Acq. Method     : D:\LC\DATA\LJ\LJ-11-51\LJ-11-51 2016-05-04 16-42-30\ODH-5-95-1ML-254NM-
30MIN.M
Last changed    : 1/1/2006 5:03:25 AM by LHC
Analysis Method : D:\LC\DATA\LJ\LJ-11-51\LJ-11-51 2016-05-04 16-42-30\012-0201.D\A.M (ODH-
5-95-1ML-254NM-30MIN.M)
Last changed    : 10/5/2016 8:35:29 PM by LHC
(modified after loading)
  
```

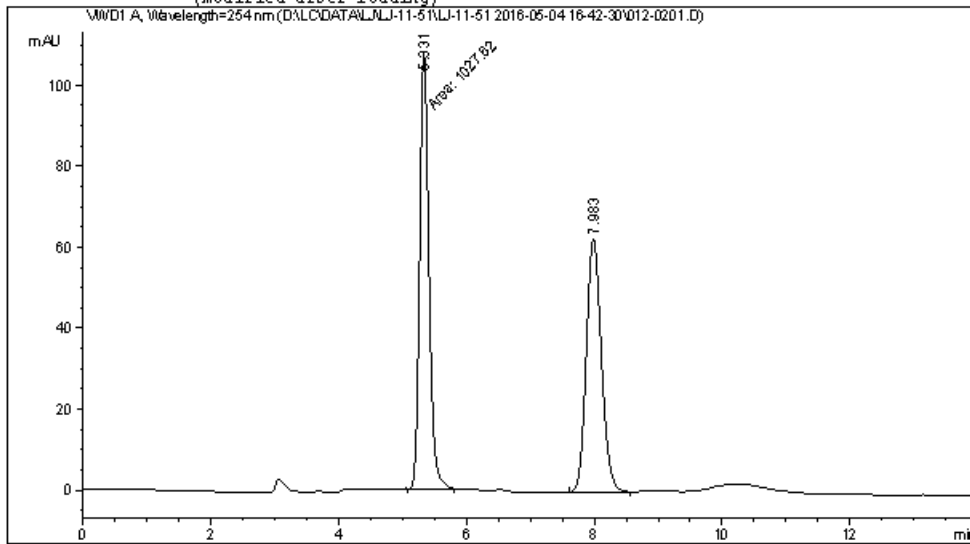

=====  
 Area Percent Report  
 =====

```

Sorted By      : Signal
Multiplier     : 1.0000
Dilution       : 1.0000
Use Multiplier & Dilution Factor with ISTDs
  
```

Signal 1: VWD1 A, Wavelength=254 nm

| Peak # | RetTime [min] | Type | Width [min] | Area mAU   | Area %  | Height [mAU] |
|--------|---------------|------|-------------|------------|---------|--------------|
| 1      | 5.331         | MM   | 0.1628      | 1027.62244 | 49.7920 | 105.21992    |
| 2      | 7.983         | BB   | 0.2543      | 1036.20618 | 50.2080 | 62.59076     |

Totals : 2063.82861 167.81068



Data File D:\LC\DATA\LJ\LJ-11-58\LJ-11-58 2016-05-09 08-58-09\004-0301.D  
 Sample Name: LJ-11-58

```

=====
Acq. Operator   : LHC                      Seq. Line :    3
Acq. Instrument : Instrument 1              Location  : Vial 4
Injection Date  : 5/9/2016 9:32:26 AM      Inj       :    1
                                                Inj Volume: 5 µl
Acq. Method     : D:\LC\DATA\LJ\LJ-11-58\LJ-11-58 2016-05-09 08-58-09\0DH-5-95-1ML-254NM-
20MIN.M
Last changed    : 12/16/2015 3:05:20 PM by LHC
Analysis Method : D:\LC\DATA\LJ\LJ-11-58\LJ-11-58 2016-05-09 08-58-09\004-0301.D\A.M (0DH-
5-95-1ML-254NM-20MIN.M)
Last changed    : 10/5/2016 7:35:04 PM by LHC
(modified after loading)
=====
  
```

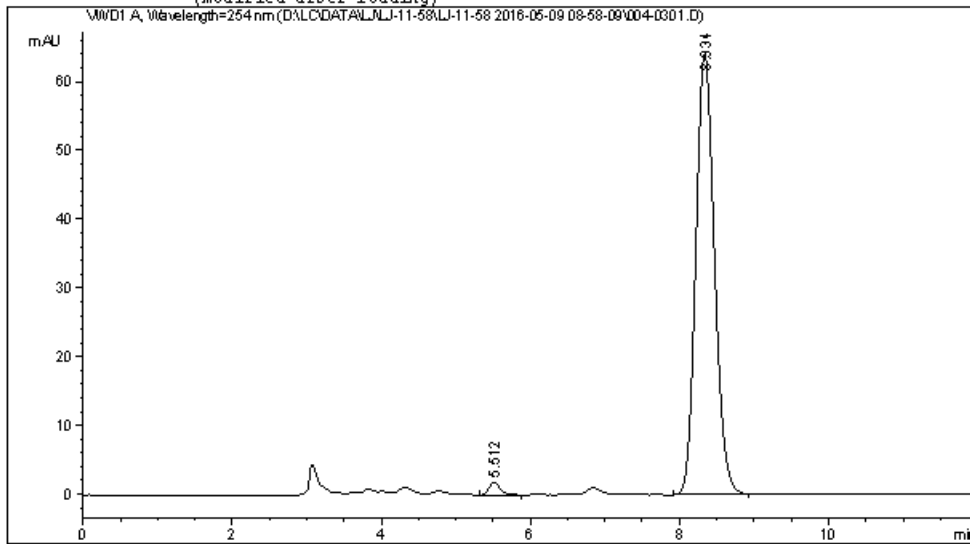

=====  
 Area Percent Report  
 =====

```

Sorted By      : Signal
Multiplier     : 1.0000
Dilution       : 1.0000
Use Multiplier & Dilution Factor with ISTDs
  
```

Signal 1: VWD1 A, Wavelength=254 nm

| Peak #   | RetTime [min] | Type | Width [min] | Area mAU   | Area %  | Height [mAU] |
|----------|---------------|------|-------------|------------|---------|--------------|
| 1        | 5.512         | BB   | 0.1615      | 19.27642   | 1.7045  | 1.81834      |
| 2        | 8.334         | BB   | 0.2693      | 1111.63354 | 98.2955 | 64.09818     |
| Totals : |               |      |             | 1130.90996 |         | 65.91652     |

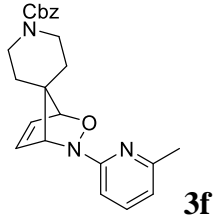

Data File D:\LC\DATA\LJ\LJ-11-90\LJ-11-90-4 2016-07-07 14-51-05\096-0301.D  
 Sample Name: LJ-11-90-1

```

=====
Acq. Operator   : LHC                               Seq. Line :    3
Acq. Instrument : Instrument 1                       Location  : Vial 96
Injection Date  : 7/7/2016 3:35:13 PM              Inj       :    1
                                                    Inj Volume: 5 µl
Acq. Method     : D:\LC\DATA\LJ\LJ-11-90\LJ-11-90-4 2016-07-07 14-51-05\0DH-20-80-1ML-254NM-30MIN.M
Last changed    : 1/1/2006 1:57:18 AM by LHC
Analysis Method : D:\LC\DATA\LJ\LJ-11-90\LJ-11-90-4 2016-07-07 14-51-05\096-0301.D\DA.M (
                  0DH-20-80-1ML-254NM-30MIN.M)
Last changed    : 10/5/2016 6:33:57 PM by LHC
                  (modified after loading)
=====
  
```

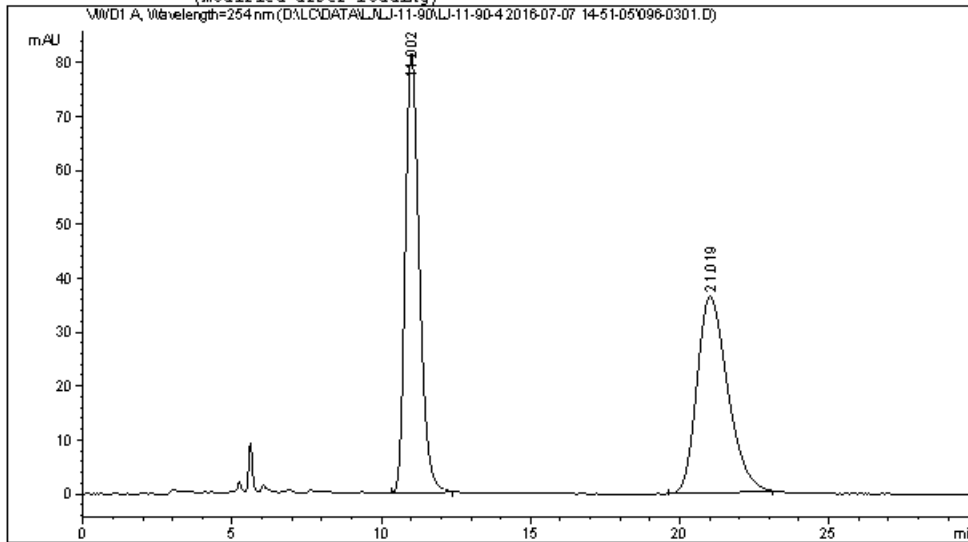

=====  
 Area Percent Report  
 =====

```

Sorted By      : Signal
Multiplier     : 1.0000
Dilution       : 1.0000
Use Multiplier & Dilution Factor with ISTDs
  
```

Signal 1: VWD1 A, Wavelength=254 nm

| Peak # | RetTime [min] | Type | Width [min] | Area mAU   | Area %s  | Height [mAU] | Area % |
|--------|---------------|------|-------------|------------|----------|--------------|--------|
| 1      | 11.002        | BB   | 0.5043      | 2667.27710 | 81.46521 | 50.5340      |        |
| 2      | 21.019        | BB   | 1.0547      | 2610.91016 | 36.42158 | 49.4660      |        |

Totals :                    5278.18726 117.88679

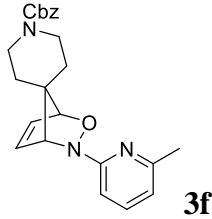

Data File D:\LC\DATA\LJ\LJ-11-90\LJ-11-90-4 2016-07-07 14-51-05\098-0201.D  
 Sample Name: LJ-11-90-2

```

=====
Acq. Operator   : LHC                      Seq. Line :    2
Acq. Instrument : Instrument 1              Location  : Vial 98
Injection Date  : 7/7/2016 3:03:37 PM      Inj       :    1
                                           Inj Volume: 5 µl
Acq. Method     : D:\LC\DATA\LJ\LJ-11-90\LJ-11-90-4 2016-07-07 14-51-05\0DH-20-80-1ML-254NM-30MIN.M
Last changed    : 1/1/2006 1:57:18 AM by LHC
Analysis Method : D:\LC\DATA\LJ\LJ-11-90\LJ-11-90-4 2016-07-07 14-51-05\098-0201.D\DA.M (
                  0DH-20-80-1ML-254NM-30MIN.M)
Last changed    : 10/5/2016 6:44:17 PM by LHC
                  (modified after loading)
=====
  
```

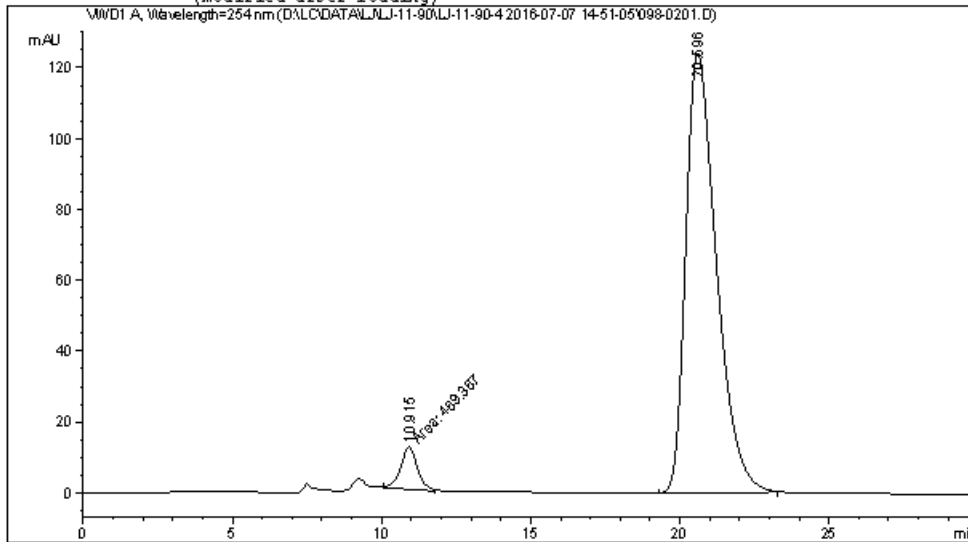

=====  
 Area Percent Report  
 =====

```

Sorted By      :      Signal
Multiplier     :      1.0000
Dilution      :      1.0000
Use Multiplier & Dilution Factor with ISTDs
  
```

Signal 1: VWD1 A, Wavelength=254 nm

| Peak # | RetTime [min] | Type | Width [min] | Area mAU   | Area %s   | Height [mAU] | Area % |
|--------|---------------|------|-------------|------------|-----------|--------------|--------|
| 1      | 10.915        | MM   | 0.6517      | 469.36676  | 12.00426  | 5.0319       |        |
| 2      | 20.596        | BB   | 1.0799      | 8858.53125 | 124.16433 | 94.9681      |        |

Totals :                    9327.89801  136.16859



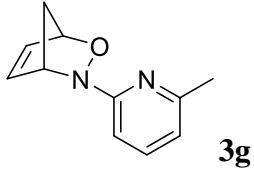

Data File D:\LC\DATA\LJ\LJ-10-9\LJ-10-9 2015-12-16 20-46-49\005-0201.D  
 Sample Name: LJ-10-9A

```

=====
Acq. Operator   : LHC                      Seq. Line :    2
Acq. Instrument : Instrument 1              Location  : Vial 5
Injection Date  : 12/16/2015 8:59:31 PM    Inj       :    1
                                           Inj Volume: 5 µl

Acq. Method     : D:\LC\DATA\LJ\LJ-10-9\LJ-10-9 2015-12-16 20-46-49\0DH-5-95-1ML-254NM-
20MIN.M
Last changed    : 12/16/2015 3:05:20 PM by LHC
Analysis Method : D:\LC\DATA\LJ\LJ-10-9\LJ-10-9 2015-12-16 20-46-49\005-0201.D\DA.M (0DH-5-
95-1ML-254NM-20MIN.M)
Last changed    : 6/30/2016 3:55:15 PM by LHC
                 (modified after loading)
=====
  
```

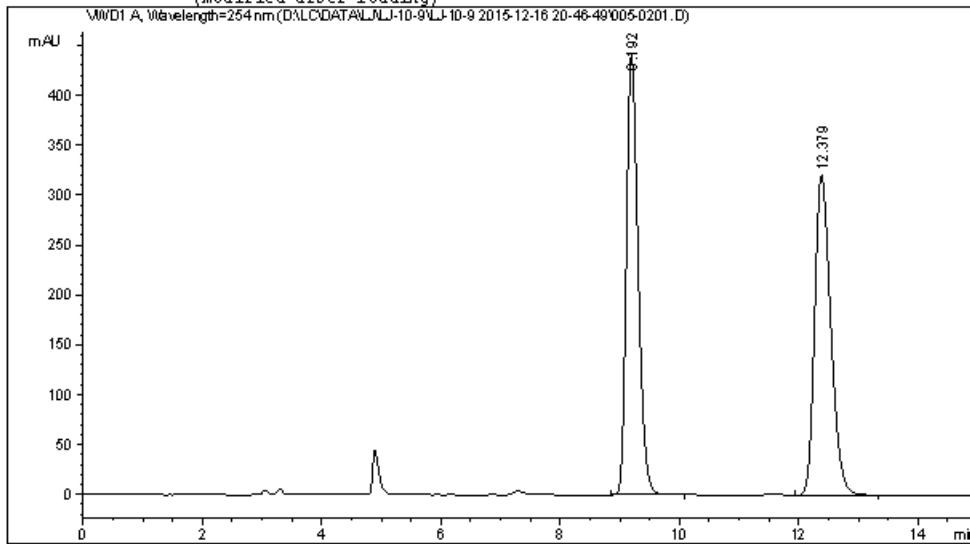

=====  
 Area Percent Report  
 =====

```

Sorted By      :      Signal
Multiplier     :      1.0000
Dilution       :      1.0000
Use Multiplier & Dilution Factor with ISTDs
  
```

Signal 1: VWD1 A, Wavelength=254 nm

| Peak # | RetTime [min] | Type | Width [min] | Area mAU *s | Height [mAU] | Area %  |
|--------|---------------|------|-------------|-------------|--------------|---------|
| 1      | 9.192         | BB   | 0.2117      | 6031.13477  | 441.73480    | 50.0634 |
| 2      | 12.379        | VB   | 0.2902      | 6015.87012  | 320.68643    | 49.9366 |

Totals :                    1.20470e4   762.42123

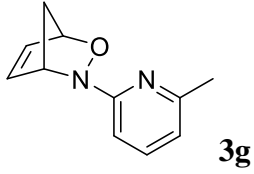

Data File D:\LC\DATA\LJ\LJ-10-9\LJ-10-9B 2015-12-16 22-13-24\006-0101.D  
 Sample Name: LJ-10-9B

```

=====
Acq. Operator   : LHC                               Seq. Line :    1
Acq. Instrument : Instrument 1                       Location  : Vial 6
Injection Date  : 12/16/2015 10:14:49 PM           Inj       :    1
                                                    Inj Volume: 5 µl

Acq. Method     : D:\LC\DATA\LJ\LJ-10-9\LJ-10-9B 2015-12-16 22-13-24\ODH-5-95-1ML-254NM-
20MIN.M
Last changed    : 12/16/2015 3:05:20 PM by LHC
Analysis Method : D:\LC\DATA\LJ\LJ-10-9\LJ-10-9B 2015-12-16 22-13-24\006-0101.D\DA.M (ODH-5-
95-1ML-254NM-20MIN.M)
Last changed    : 6/30/2016 3:58:07 PM by LHC
                (modified after loading)
  
```

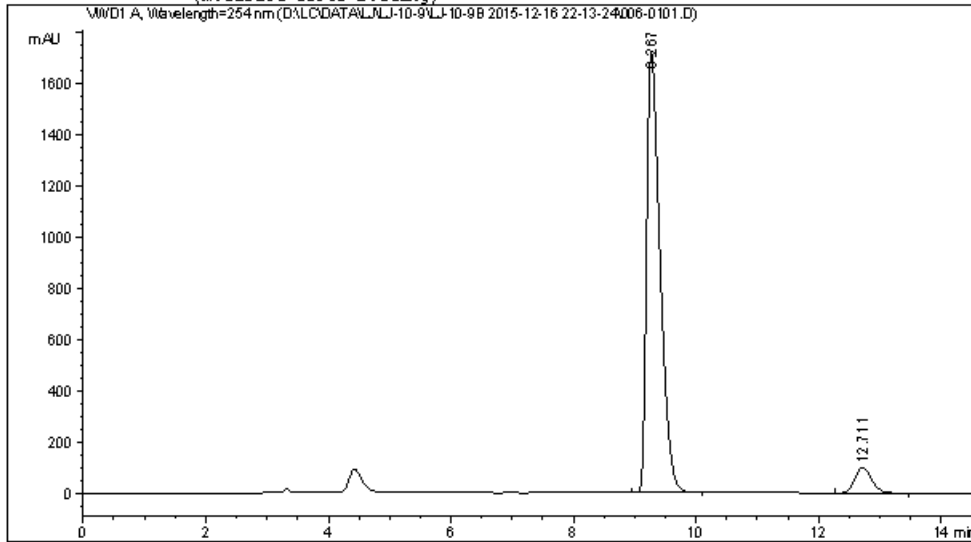

=====  
 Area Percent Report  
 =====

```

Sorted By      :      Signal
Multiplier     :      1.0000
Dilution       :      1.0000
Use Multiplier & Dilution Factor with ISTDs
  
```

Signal 1: VWD1 A, Wavelength=254 nm

| Peak #   | RetTime [min] | Type | Width [min] | Area mAU *s | Height [mAU] | Area %  |
|----------|---------------|------|-------------|-------------|--------------|---------|
| 1        | 9.267         | BB   | 0.2333      | 2.62811e4   | 1723.06848   | 93.2153 |
| 2        | 12.711        | VB   | 0.2942      | 1912.88696  | 100.81892    | 6.7847  |
| Totals : |               |      |             | 2.81940e4   | 1823.88741   |         |

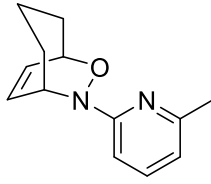

**3h**

Data File D:\LC\DATA\LJ\LJ-11-79\LJ-11-79 2016-05-23 18-17-38\003-0801.D  
 Sample Name: LJ-11-79B

```

=====
Acq. Operator   : WZF                               Seq. Line :    8
Acq. Instrument : Instrument 1                       Location  : Vial 3
Injection Date  : 5/23/2016 7:54:12 PM             Inj       :    1
                                                    Inj Volume: 5 µl

Acq. Method     : D:\LC\DATA\LJ\LJ-11-79\LJ-11-79 2016-05-23 18-17-38\ODH-5-95-1ML-254NM-
20MIN.M
Last changed    : 5/23/2016 7:52:54 PM by WZF
                  (modified after loading)
Analysis Method : D:\LC\DATA\LJ\LJ-11-79\LJ-11-79 2016-05-23 18-17-38\003-0801.D\DA.M (ODH-
5-95-1ML-254NM-20MIN.M)
Last changed    : 10/5/2016 6:57:27 PM by LHC
                  (modified after loading)
=====
  
```

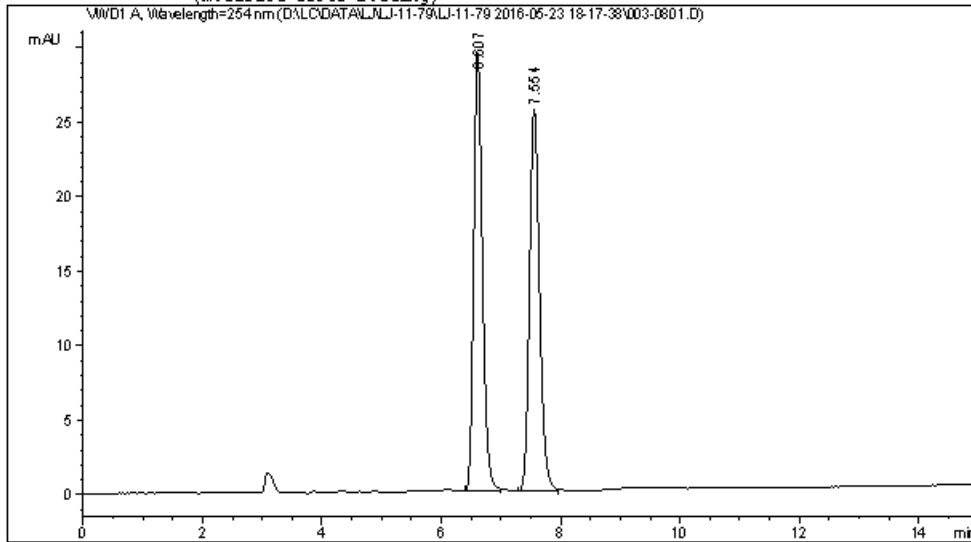

=====  
 Area Percent Report  
 =====

```

Sorted By      : Signal
Multiplier     : 1.0000
Dilution       : 1.0000
Use Multiplier & Dilution Factor with ISTDs
  
```

Signal 1: VWD1 A, Wavelength=254 nm

| Peak # | RetTime [min] | Type | Width [min] | Area mAU  | Area %  | Height [mAU] | Area %  |
|--------|---------------|------|-------------|-----------|---------|--------------|---------|
| 1      | 6.607         | BB   | 0.1565      | 298.76682 | 50.0087 | 29.37936     | 50.0087 |
| 2      | 7.554         | BB   | 0.1797      | 298.66275 | 49.9913 | 25.61117     | 49.9913 |

Totals :                                    597.42957    54.99053

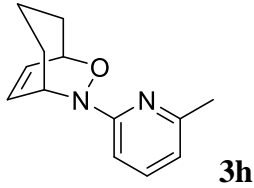

Data File D:\LC\DATA\LJ\LJ-12-20\LJ-12-20A 2016-06-29 18-19-13\010-0201.D  
 Sample Name: LJ-12-21A

```

=====
Acq. Operator   : LHC                      Seq. Line :    2
Acq. Instrument : Instrument 1              Location  : Vial 10
Injection Date  : 6/29/2016 6:31:47 PM     Inj       :    1
                                           Inj Volume: 5 µl

Acq. Method     : D:\LC\DATA\LJ\LJ-12-20\LJ-12-20A 2016-06-29 18-19-13\ODH-5-95-1ML-254NM-
20MIN.M
Last changed    : 12/16/2015 3:05:20 PM by LHC
Analysis Method : D:\LC\DATA\LJ\LJ-12-20\LJ-12-20A 2016-06-29 18-19-13\010-0201.D\DA.M (ODH-
5-95-1ML-254NM-20MIN.M)
Last changed    : 10/5/2016 6:59:09 PM by LHC
                 (modified after loading)
  
```

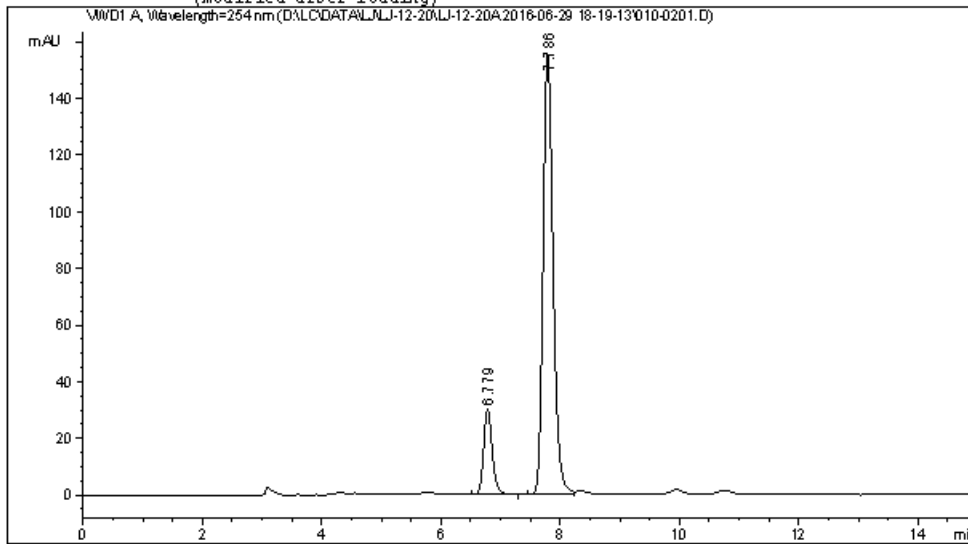

=====  
 Area Percent Report  
 =====

```

Sorted By      :      Signal
Multiplier     :      1.0000
Dilution       :      1.0000
Use Multiplier & Dilution Factor with ISTDs
  
```

Signal 1: VWD1 A, Wavelength=254 nm

| Peak # | RetTime [min] | Type | Width [min] | Area mAU   | Area %  | Height [mAU] |
|--------|---------------|------|-------------|------------|---------|--------------|
| 1      | 6.779         | VB   | 0.1572      | 307.61816  | 14.4776 | 30.07200     |
| 2      | 7.786         | BV   | 0.1786      | 1817.16223 | 85.5224 | 155.50630    |

Totals :                    2124.78040   185.57830

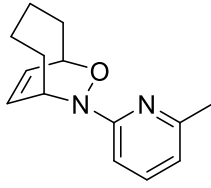

**3i**

Data File D:\LC\DATA\LJ\LJ-11-104\LJ-11-104 2016-06-07 09-12-44\006-0401.D  
 Sample Name: LJ-11-103-1

```

=====
Acq. Operator   : HR                               Seq. Line :    4
Acq. Instrument : Instrument 1                     Location  : Vial 6
Injection Date  : 6/7/2016 10:08:23 AM           Inj       :    1
                                                    Inj Volume: 5 µl

Acq. Method     : D:\LC\DATA\LJ\LJ-11-104\LJ-11-104 2016-06-07 09-12-44\ODH-5-95-1ML-254NM-
30MIN.M
Last changed    : 6/7/2016 10:07:06 AM by HR
(modified after loading)
Analysis Method : D:\LC\DATA\LJ\LJ-11-104\LJ-11-104 2016-06-07 09-12-44\006-0401.D\DA.M (
ODH-5-95-1ML-254NM-30MIN.M)
Last changed    : 7/6/2016 4:26:51 PM by LHC
(modified after loading)
=====
  
```

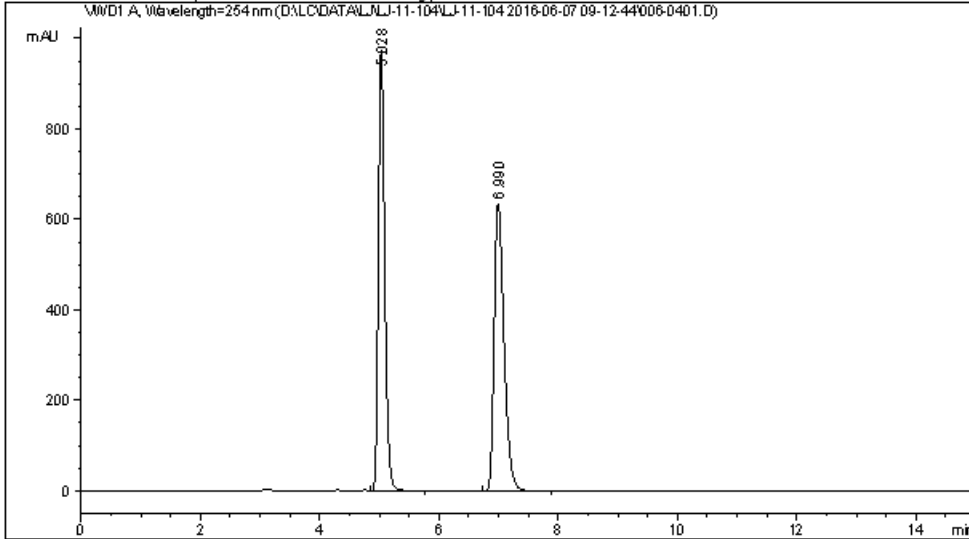

=====  
 Area Percent Report  
 =====

```

Sorted By      : Signal
Multiplier     : 1.0000
Dilution       : 1.0000
Use Multiplier & Dilution Factor with ISTDs
  
```

Signal 1: VWD1 A, Wavelength=254 nm

| Peak # | RetTime [min] | Type | Width [min] | Area mAU   | Area %  | Height [mAU] | Area %  |
|--------|---------------|------|-------------|------------|---------|--------------|---------|
| 1      | 5.028         | VB   | 0.1144      | 7243.91504 | 49.8337 | 974.32288    | 49.8337 |
| 2      | 6.990         | BB   | 0.1760      | 7292.25342 | 50.1663 | 636.03137    | 50.1663 |

Totals : 1.45362e4 1610.35425

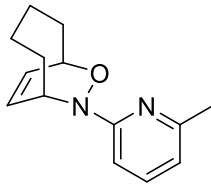

**3i**

Data File D:\LC\DATA\LJ\LJ-12-15\LJ-12-15 2016-06-17 10-04-00\014-0201.D  
 Sample Name: LJ-12-15-3

```

=====
Acq. Operator   : LHC                               Seq. Line :    2
Acq. Instrument : Instrument 1                       Location  : Vial 14
Injection Date  : 6/17/2016 10:16:29 AM             Inj       :    1
                                                    Inj Volume: 5 µl

Acq. Method     : D:\LC\DATA\LJ\LJ-12-15\LJ-12-15 2016-06-17 10-04-00\0DH-5-95-1ML-254NM-
                20MIN.M
Last changed    : 12/16/2015 3:05:20 PM by LHC
Analysis Method : D:\LC\DATA\LJ\LJ-12-15\LJ-12-15 2016-06-17 10-04-00\014-0201.D\A.M (0DH-
                5-95-1ML-254NM-20MIN.M)
Last changed    : 7/6/2016 4:24:51 PM by LHC
                (modified after loading)
=====
  
```

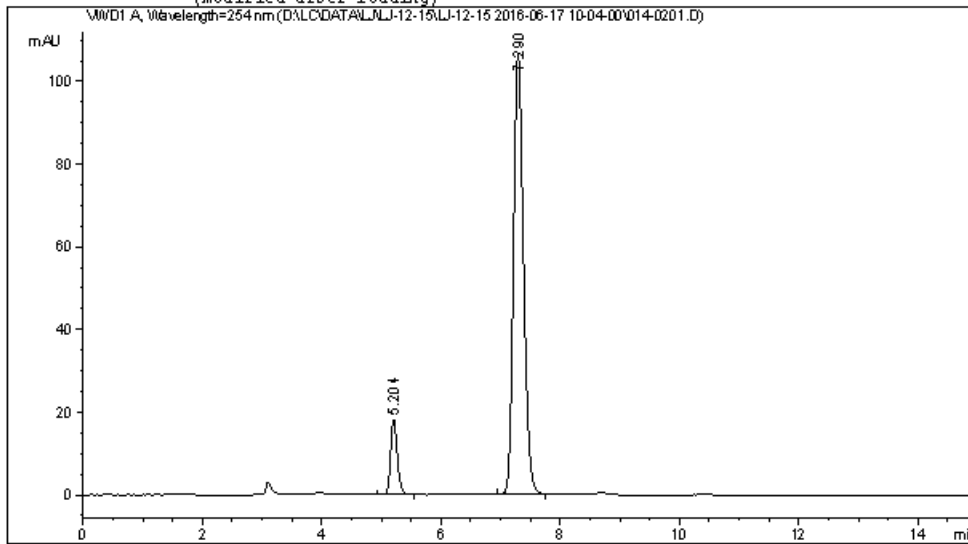

=====  
 Area Percent Report  
 =====

```

Sorted By      :      Signal
Multiplier     :      1.0000
Dilution       :      1.0000
Use Multiplier & Dilution Factor with ISTDs
  
```

Signal 1: VWD1 A, Wavelength=254 nm

| Peak # | RetTime [min] | Type | Width [min] | Area mAU   | Area %  | Height [mAU] |
|--------|---------------|------|-------------|------------|---------|--------------|
| 1      | 5.204         | BB   | 0.1205      | 142.33124  | 10.2667 | 18.16833     |
| 2      | 7.290         | VB   | 0.1800      | 1244.01306 | 89.7333 | 106.50106    |

Totals :                    1386.34430   124.66940

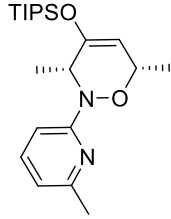

Data File D:\LC\DATA\LJ\LJ-11-90\LJ-11-90-ODH-2 2016-05-30 22-23-17\001-0801.D  
 Sample Name: LJ-11-79A

```

=====
Acq. Operator   : HR                      Seq. Line :    8
Acq. Instrument : Instrument 1             Location  : Vial 1
Injection Date  : 5/31/2016 2:34:49 AM    Inj       :    1
                                           Inj Volume: 5 µl
Acq. Method     : D:\LC\DATA\LJ\LJ-11-90\LJ-11-90-ODH-2 2016-05-30 22-23-17\ODH-0-100-IML-
                254NM-40MIN.M
Last changed    : 5/30/2016 10:18:58 PM by HR
Analysis Method : D:\LC\DATA\LJ\LJ-11-90\LJ-11-90-ODH-2 2016-05-30 22-23-17\001-0801.D\DA.M
                (ODH-0-100-IML-254NM-40MIN.M)
Last changed    : 10/5/2016 6:42:55 PM by LHC
                (modified after loading)
=====
  
```

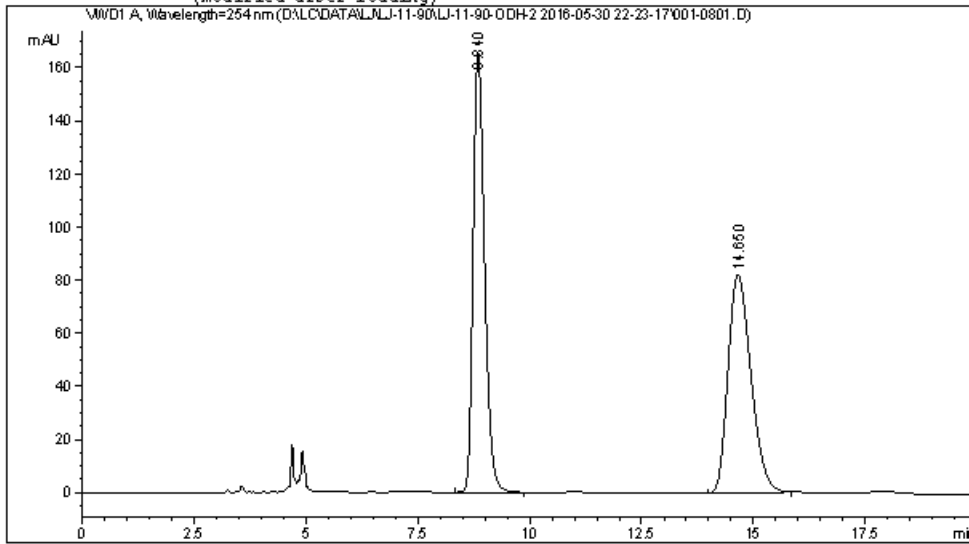

=====  
 Area Percent Report  
 =====

```

Sorted By      :      Signal
Multiplier     :      1.0000
Dilution       :      1.0000
Use Multiplier & Dilution Factor with ISTDs
  
```

Signal 1: VWD1 A, Wavelength=254 nm

| Peak # | RetTime [min] | Type | Width [min] | Area mAU*s | Height [mAU] | Area %  |
|--------|---------------|------|-------------|------------|--------------|---------|
| 1      | 8.840         | BB   | 0.2755      | 2958.30957 | 165.51152    | 50.2429 |
| 2      | 14.650        | BB   | 0.5571      | 2929.70850 | 82.17965     | 49.7571 |

Totals :                    5888.01807   247.69117



Data File D:\LC\DATA\LJ\LJ-11-90\LJ-11-90-ODH-2 2016-05-30 22-23-17\003-0901.D  
 Sample Name: LJ-11-76

```

=====
Acq. Operator   : HR                               Seq. Line :    9
Acq. Instrument : Instrument 1                     Location  : Vial 3
Injection Date  : 5/31/2016 3:16:23 AM           Inj       :    1
                                                    Inj Volume: 5 µl
Acq. Method     : D:\LC\DATA\LJ\LJ-11-90\LJ-11-90-ODH-2 2016-05-30 22-23-17\ODH-0-100-IML-
                254NM-40MIN.M
Last changed    : 5/30/2016 10:18:58 PM by HR
Analysis Method : D:\LC\DATA\LJ\LJ-11-90\LJ-11-90-ODH-2 2016-05-30 22-23-17\003-0901.D\DA.M
                (ODH-0-100-IML-254NM-40MIN.M)
Last changed    : 10/5/2016 6:41:06 PM by LHC
                (modified after loading)
=====
  
```

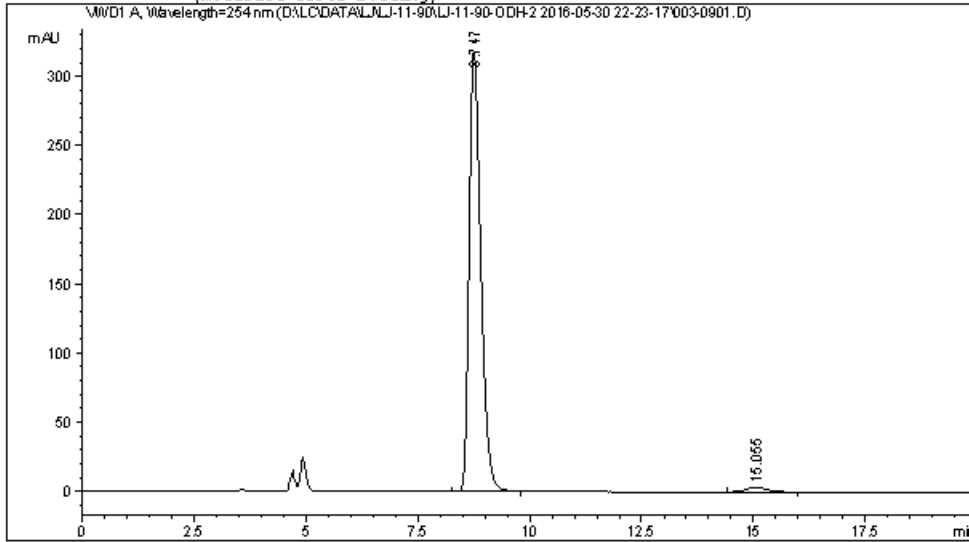

=====  
 Area Percent Report  
 =====

```

Sorted By      :      Signal
Multiplier     :      1.0000
Dilution       :      1.0000
Use Multiplier & Dilution Factor with ISTDs
  
```

Signal 1: VWD1 A, Wavelength=254 nm

| Peak # | RetTime [min] | Type | Width [min] | Area mAU*s | Height [mAU] | Area %  |
|--------|---------------|------|-------------|------------|--------------|---------|
| 1      | 8.747         | BB   | 0.2773      | 5781.29346 | 318.45264    | 98.1470 |
| 2      | 15.055        | BB   | 0.4589      | 109.15193  | 3.15551      | 1.8530  |

Totals :                    5890.44539   321.60815
